# Supplementary material for: Lipidomic Analysis of Plasma Extracellular Vesicles Derived from Alzheimer’s Disease Patients
Source: Cells. 2024 Apr 18;13(8):702. doi: 10.3390/cells13080702 (PMC11049154; doi:10.3390/cells13080702)
Supplement: Supplementary file 1 [file cells-13-00702-s001.zip › Supplemental_Tables.xlsx]

## Sheet: Sup Table 1
Table S1: Relative quantitative percentage (%T-lip) and p values for lipid classes obtained from EV subfamilies (L1CAM, GLAST, Tetraspanin) of AD and healthy control samples
Relative quantitative percentage (%T-lip)								p values for lipid classes, statistically significant samples: * (p < 0.05), ** (p < 0.01), *** (p< 0.001).
Lipid classes	L1CAM-AD	L1CAM-Healthy Control	GLAST-AD	GLAST- Healthy Control	Tetraspanin-AD	Tetraspanin- Healthy Control		Lipid Classes	L1CAM-AD vs. L1CAM- CON	GLAST-AD vs. GLAST- CON	Tetra-AD vs. Tetra- CON	L1CAM -AD vs. GLAST-AD	L1CAM-CON vs. GLAST-CON	L1CAM-AD vs. Tetra-AD	L1CAM-CON vs. Tetra- CON	GLAST-AD vs. Tetra-AD	GLAST-CON vs. Tetra-CON
FC-%T-lip	32.79 ±12.44	32.57 ±7.33	29.80 ±7.22	31.64 ±4.43	31.35 ±5.31	36.92 ± 6.71		FC	0.981	0.712	0.231	0.433	0.662	0.818	0.148	0.583	0.023*
CE-%T-lip	51.49 ±9.55	49.18 ±10.00	55.49 ±6.12	51.64 ±6.38	53.77 ±4.79	47.37 ±6.73		CE	0.787	0.506	0.226	0.259	0.337	0.669	0.526	0.477	0.027*
AC-%T-lip	0.02 ±0.01	0.02 ±0.01	0.02 ±0.00	0.02 ±0.00	0.02 ±0.00	0.02 ±0.00		AC	0.953	0.269	0.225	0.243	0.55	0.773	0.414	0.059	0.942
MG-%T-lip	1.12 ±0.62	1.02 ±0.27	0.78 ±0.14	1.48 ±0.90	1.10 ±0.26	1.41 ±0.60		MG	0.753	0.133	0.316	0.237	0.239	0.962	0.143	0.026*	0.89
DG-%T-lip	0.07 ±0.02	0.13 ±0.10	0.07 ±0.02	0.11 ±0.08	0.05 ±0.01	0.09 ±0.09		DG	0.282	0.329	0.407	0.678	0.189	0.015*	0.082	0.009**	0.345
TG-%T-lip	3.05 ±1.73	4.71 ±3.69	2.86 ±1.47	3.55 ±2.87	1.59 ±0.48	2.27 ±2.07		TG	0.266	0.618	0.527	0.55	0.074	0.069	0.059	0.048	0.067
Cer-%T-lip	0.09 ±0.04	0.11 ±0.05	0.11 ±0.02	0.12 ±0.04	0.11 ±0.02	0.12 ±0.04		Cer	0.454	0.531	0.354	0.434	0.67	0.075	0.154	0.952	0.229
dhCer-%T-lip	0.004 ±0.000	0.005 ± 0.002	0.005 ±0.001	0.005 ±0.002	0.005 ±0.001	0.006 ±0.0001		dhCer	0.431	0.809	0.46	0.008**	0.385	0.174	0.128	0.567	0.795
SM-%T-lip	3.00 ±0.75	3.35 ±0.94	3.35 ±0.26	3.39 ±0.26	3.65 ±0.31	3.70 ±0.77		SM	0.595	0.853	0.923	0.227	0.915	0.058	0.302	0.11	0.29
dhSM-%T-lip	0.12 ±0.03	0.10 ±0.02	0.10 ±0.01	0.09 ±0.01	0.12 ±0.03	0.12 ±0.02		dhSM	0.458	0.447	0.957	0.22	0.116	0.945	0.34	0.191	0.045*
MhCer-%T-lip	0.07 ±0.03	0.07 ±0.01	0.05 ±0.02	0.06 ±0.01	0.06 ±0.02	0.07 ±0.01		MhCer	0.979	0.555	0.315	0.189	0.007**	0.756	0.338	0.143	0.023*
Sulf-%T-lip	0.03 ±0.00	0.02 ±0.00	0.03 ±0.00	0.03 ±0.00	0.03 ±0.00	0.03 ±0.01		Sulf	0.583	0.395	0.733	0.284	0.55	0.031*	0.006**	0.077	0.032*
LacCer-%T-lip	0.03 ±0.01	0.03 ±0.01	0.02 ±0.00	0.02 ±0.01	0.02 ±0.01	0.02 ±0.00		LacCer	0.924	0.46	0.827	0.434	0.534	0.471	0.279	0.681	0.144
GM3-%T-lip	0.03 ±0.01	0.02 ±0.00	0.02 ±0.00	0.02 ±0.00	0.03 ±0.01	0.03 ±0.01		GM3	0.071	0.157	0.866	0.273	0.784	0.149	0.013*	0.106	0.008**
GB3-%T-lip	0.005 ±0.002	0.005 ±0.001	0.004 ±0.001	0.004 ±0.001	0.005 ±0.001	0.005 ±0.001		GB3	0.753	0.554	0.309	0.403	0.06	0.844	0.996	0.135	0.021*
PA-%T-lip	0.01 ±0.00	0.02 ±0.01	0.02 ±0.01	0.01 ±0.00	0.02 ±0.00	0.01 ±0.00		PA	0.716	0.386	0.003**	0.571	0.176	0.139	0.25	0.354	0.703
PC-%T-lip	4.90 ±0.86	5.49 ±1.64	4.75 ±0.88	4.92 ±0.93	5.34 ±0.36	4.76 ±1.09		PC	0.448	0.742	0.25	0.357	0.26	0.327	0.091	0.241	0.455
PCe-%T-lip	0.65 ±0.15	0.69 ±0.10	0.58 ±0.14	0.62 ±0.07	0.63 ±0.09	0.64 ±0.11		PCe	0.591	0.511	0.951	0.068	0.041*	0.736	0.017*	0.207	0.6
PE-%T-lip	0.84 ±0.09	0.82 ±0.20	0.63 ±0.18	0.75 ±0.15	0.63 ±0.10	0.74 ±0.21		PE	0.849	0.389	0.333	0.098	0.136	0.0006***	0.329	0.995	0.868
PEp-%T-lip	0.85 ±0.12	0.87 ±0.19	0.60 ±0.15	0.84 ±0.20	0.61 ±0.08	0.81 ±0.25		PEp	0.828	0.081	0.103	0.062	0.628	0.002*	0.457	0.898	0.605
PS-%T-lip	0.04 ±0.01	0.03 ±0.01	0.04 ±0.01	0.02 ±0.01	0.04 ±0.01	0.02 ±0.00		PS	0.269	0.017*	0.021*	0.781	0.094	0.612	0.057	0.798	0.578
PI-%T-lip	0.50 ±0.17	0.41 ±0.14	0.40 ±0.08	0.36 ±0.10	0.44 ±0.15	0.41 ±0.12		PI	0.39	0.589	0.78	0.146	0.079	0.207	0.842	0.318	0.131
PG-%T-lip	0.002 ±0.000	0.003 ±0.001	0.002 ±0.000	0.002 ±0.001	0.003 ±0.001	0.004 ±0.001		PG	0.219	0.885	0.896	0.431	0.111	0.005*	0.096	0.024*	0.061
BMP-%T-lip	0.001 ±0.000	0.001 ±0.000	0.001 ±0.001	0.001 ±0.001	0.001 ±0.000	0.001 ±0.000		BMP	0.605	0.209	0.393	0.486	0.115	0.59	0.297	0.468	0.048*
AcylPG-%T-lip	0.001 ±0.000	0.001 ±0.000	0.001 ±0.002	0.001 ±0.000	0.001 ±0.000	0.001 ±0.001		AcylPG	0.222	0.292	0.251	0.407	0.727	0.057	0.434	0.272	0.311
LPC-%T-lip	0.23 ±0.080	0.26 ±0.06	0.21 ±0.04	0.24 ±0.03	0.27 ±0.09	0.32 ±0.05		LPC	0.563	0.355	0.421	0.457	0.374	0.175	0.088	0.038*	0.003**
LPCe-%T-lip	0.006 ±0.002	0.005 ±0.001	0.005 ±0.001	0.005 ±0.001	0.007 ±0.002	0.007 ±0.001		LPCe	0.773	0.871	0.991	0.393	0.337	0.272	0.063	0.032*	0.0009***
LPE-%T-lip	0.029 ±0.008	0.031 ±0.008	0.025±0.003	0.027 ±0.007	0.034 ±0.004	0.032 ±0.009		LPE	0.761	0.604	0.664	0.309	0.076	0.27	0.701	0.032*	0.233
LPEp-%T-lip	0.02 ±0.00	0.02 ±0.01	0.02 ±0.01	0.02 ±0.01	0.03 ±0.01	0.02 ±0.01		LPEp	0.732	0.144	0.303	0.55	0.187	0.2	0.521	0.507	0.665
LPI-%T-lip	0.003 ±0.000	0.002 ±0.001	0.004 ±0.001	0.003 ±0.001	0.006 ±0.001	0.005 ±0.001		LPI	0.149	0.558	0.296	0.255	0.052	0.002*	0.006**	0.002**	0.004**
LPS-%T-lip	0.018 ±0.002	0.011 ±0.004	0.006 ±0.001	0.007 ±0.002	0.007 ±0.001	0.005 ±0.003		LPS	0.186	0.191	0.192	0.032*	0.026*	0.385	0.019*	0.117	0.109
NAPE-%T-lip	0.001 ±0.000	0.001 ±0.000	0.001 ±0.002	0.000 ±0.000	0.001 ±0.000	0.001 ±0.000		NAPE	0.145	0.302	0.502	0.449	0.5	0.273	0.501	0.327	0.353
NAPS-%T-lip	0.000 ±0.000	0.000 ±0.000	0.000 ±0.000	0.000 ±0.000	0.000 ±0.000	0.000 ±0.000		NAPS	0	0	0	0	0	0	0	0	0
NSer-%T-lip	0.001 ±0.000	0.002 ±0.001	0.002 ±0.001	0.002 ±0.001	0.002 ±0.001	0.016 ±0.031		NSer	0.14	0.888	0.376	0.115	0.894	0.134	0.39	0.487	0.373

## Sheet: Sup. Table 2
Table S2: The p values of the average of main lipid categories (sterol lipids, glycerolipids, sphingolipids and glycerophosholipids) obtained from EV subfamilies (L1CAM, GLAST, Tetraspanin) of AD and control samples
p values for lipid categories, statistically significant samples: * (p < 0.05), ** (p < 0.01).
Lipid Categories	L1CAM-AD vs. L1CAM- CON	GLAST-AD vs. GLAST- CON	Tetra-AD vs. Tetra- CON	L1CAM -AD vs. GLAST-AD	L1CAM-CON vs. GLAST-CON	L1CAM-AD vs. Tetra-AD	L1CAM-CON vs. Tetra- CON	GLAST-AD vs. Tetra-AD	GLAST-CON vs. Tetra-CON
Sterol lipids	0.349	0.341	0.686	0.267	0.145	0.536	0.125	0.774	0.418
Glycerolipids	0.314	0.385	0.387	0.333	0.051	0.113	0.086	0.092	0.128
Sphingolipid	0.616	0.859	0.891	0.307	0.952	0.059	0.263	0.099	0.232
Glycerophosholipids	0.612	0.482	0.67	0.073	0.171	0.905	0.023*	0.157	0.7
Lysophosholipids	0.556	0.375	0.496	0.425	0.269	0.16	0.118	0.021*	0.005**

## Sheet: Sup. Table 3 
Table S3. Relative quantitative percentage (%T-lip) and p values for each lipid class obtained from EV subfamilies (L1CAM, GLAST, Tetraspanin) of AD and healthy control samples
Relative quantitative percentage (%T-lip)								p values for lipid classes, statistically significant samples: * (p < 0.05), ** (p < 0.01), *** (p< 0.001).
Lipid								Lipid
cholesteryl esters (CE)	L1CAM-AD	L1CAM-Control	GLAST-AD	GLAST- Control	Tetraspanin-AD	Tetraspanin- Control		Cholesteryl esters (CE)	L1CAM-AD vs. L1CAM- CON	GLAST-AD vs. GLAST- CON	Tetra-AD vs. Tetra- CON	L1CAM -AD vs. GLAST-AD	L1CAM-CON vs. GLAST-CON	L1CAM-AD vs. Tetra-AD	L1CAM-CON vs. Tetra- CON	GLAST-AD vs. Tetra-AD	GLAST-CON vs. Tetra-CON
CE 16:0-%T-lip	1.17 ±0.20	1.16 ±0.25	1.10 ±0.08	1.09 ± 0.19	1.06 ±0.09	1.06 ±0.23		CE 16:0	0.911	0.817	0.98	0.329	0.118	0.135	0.042	0.093	0.558
CE 16:1-%T-lip	0.35 ±0.11	0.29 ±0.23	0.37 ±0.12	0.26 ±0.18	0.37 ±0.08	0.24 ±0.18		CE 16:1	0.634	0.236	0.242	0.479	0.273	0.701	0.167	0.895	0.253
CE 18:0-%T-lip	0.15 ±0.02	0.13 ±0.03	0.16 ±0.02	0.14 ±0.02	0.15 ±0.02	0.13 ±0.03		CE 18:0	0.434	0.246	0.231	0.114	0.221	0.185	0.816	0.589	0.116
CE 18:1-%T-lip	6.09 ±0.97	5.26 ±1.47	6.54 ±0.64	5.58 ±1.08	6.56 ±0.74	5.57 ±1.04		CE 18:1	0.363	0.218	0.189	0.074	0.281	0.167	0.305	0.944	0.938
CE 18:2-%T-lip	30.70 ±8.44	30.33 ±8.28	33.56 ±5.10	31.75 ±4.84	32.78 ±1.91	28.75 ±5.63		CE 18:2	0.959	0.682	0.272	0.271	0.462	0.619	0.493	0.717	0.102
CE 20:0-%T-lip	0.00 ±0.00	0.00 ±0.00	0.00 ±0.00	0.00 ±0.00	0.00 ±0.00	0.00 ±0.00		CE 20:0	0	0	0	0	0	0	0	0	0
CE 20:1-%T-lip	0.007 ±0.002	0.007 ±0.002	0.008 ±0.002	0.010 ±0.001	0.009 ±0.003	0.010 ±0.001		CE 20:1	0.835	0.091	0.602	0.611	0.052	0.378	0.03	0.626	0.628
CE 20:2-%T-lip	0.05 ±0.01	0.05 ±0.01	0.06 ±0.01	0.05 ±0.00	0.06 ±0.01	0.05 ±0.01		CE 20:2	0.4	0.342	0.359	0.053	0.047	0.332	0.21	0.435	0.177
CE 20:3-%T-lip	1.06 ±0.22	1.00 ±0.11	1.19 ±0.32	1.08 ±0.12	1.10 ±0.27	1.00 ±0.11		CE 20:3	0.671	0.521	0.476	0.113	0.066	0.447	0.981	0.063	0.001***
CE 20:4-%T-lip	10.58 ±1.95	9.82 ±1.19	11.12 ±3.14	10.50 ±1.89	10.49 ±2.88	9.52 ±1.60		CE 20:4	0.559	0.699	0.481	0.525	0.163	0.896	0.526	0.091	0.023
CE 22:2-%T-lip	0.00 ±0.00	0.00 ±0.00	0.00 ±0.00	0.00 ±0.00	0.00 ±0.00	0.00 ±0.00		CE 22:2	0	0	0	0	0	0	0	0	0
CE 22:3-%T-lip	0.004 ±0.002	0.003 ±0.001	0.004 ±0.001	0.003 ±0.001	0.003 ±0.001	0.003 ±0.001		CE 22:3	0.325	0.027*	0.999	0.959	0.477	0.502	0.932	0.24	0.341
CE 22:4-%T-lip	0.02 ±0.01	0.02 ±0.00	0.02 ±0.01	0.02 ±0.00	0.02 ±0.01	0.02 ±0.00		CE 22:4	0.157	0.214	0.89	0.042*	0.308	0.357	0.028*	0.006	0.696
CE 22:5-%T-lip	0.14 ±0.04	0.11 ±0.02	0.14 ±0.04	0.11 ±0.01	0.13 ±0.04	0.11 ±0.01		CE 22:5	0.26	0.205	0.286	0.596	0.608	0.638	0.736	0.116	0.078
CE 22:6-%T-lip	1.17 ±0.38	1.01 ±0.31	1.20 ±0.29	1.04 ±0.33	1.03 ±0.21	0.91 ±0.25		CE 22:6	0.618	0.587	0.591	0.572	0.696	0.202	0.186	0.041*	0.099
CE 24:2-%T-lip	0.00 ±0.00	0.00 ±0.00	0.00 ±0.00	0.00 ±0.00	0.00 ±0.00	0.00 ±0.00		CE 24:2	0	0	0	0	0	0	0	0	0
CE 24:3-%T-lip	0.00 ±0.00	0.00 ±0.00	0.00 ±0.00	0.00 ±0.00	0.00 ±0.00	0.00 ±0.00		CE 24:3	0	0	0	0	0	0	0	0	0
CE 24:4-%T-lip	0.00 ±0.00	0.00 ±0.00	0.00 ±0.00	0.00 ±0.00	0.00 ±0.00	0.00 ±0.00		CE 24:4	0.896	0.214	0.232	0.73	0.871	0.437	0.743	0.405	0.689
CE 24:5-%T-lip	0.00 ±0.00	0.00 ±0.00	0.00 ±0.00	0.00 ±0.00	0.00 ±0.00	0.00 ±0.00		CE 24:5	0.962	0.688	0.707	0.679	0.542	0.307	0.266	0.275	0.272
CE 24:6-%T-lip	0.00 ±0.00	0.00 ±0.00	0.00 ±0.00	0.00 ±0.00	0.00 ±0.00	0.00 ±0.00		CE 24:6	0.973	0.173	0.103	0.186	0.231	0.82	0.263	0.091	0.581
monoacylglycerol lipids (MG)								monoacylglycerol lipids (MG)
MG 16:0-%T-lip	0.053 ±0.092	0.030 ±0.027	0.019 ±0.011	0.108 ±0.113	0.031 ±0.040	0.110 ±0.089		MG 16:0	0.503	0.126	0.131	0.464	0.187	0.673	0.055	0.545	0.977
MG 16:1-%T-lip	0.000 ±0.000	0.000 ±0.000	0.000 ±0.000	0.000 ±0.000	0.000 ±0.000	0.000 ±0.000		MG 16:1	0	0	0	0	0	0	0	0	0
MG 18:0-%T-lip	0.249 ±0.469	0.116 ±0.125	0.058 ±0.053	0.547 ±0.621	0.135 ±0.212	0.492 ±0.395		MG 18:0	0.461	0.134	0.105	0.414	0.197	0.678	0.047*	0.498	0.887
MG 18:1-%T-lip	0.010 ±0.002	0.012 ±0.004	0.010 ±0.002	0.013 ±0.004	0.012 ±0.005	0.011 ±0.003		MG 18:1	0.413	0.171	0.462	0.895	0.58	0.45	0.396	0.419	0.273
MG 18:2-%T-lip	0.009 ±0.002	0.016 ±0.010	0.010 ±0.003	0.011 ±0.003	0.009 ±0.007	0.005 ±0.002		MG 18:2	0.217	0.451	0.24	0.422	0.22	0.933	0.044*	0.919	0.001**
MG 18:3-%T-lip	0.000 ±0.000	0.000 ±0.000	0.000 ±0.000	0.000 ±0.000	0.000 ±0.000	0.000 ±0.000		MG 18:3	0	0	0	0	0	0	0	0	0
MG 20:0-%T-lip	0.682 ±0.102	0.710 ±0.195	0.571 ±0.090	0.675 ±0.168	0.811 ±0.189	0.705 ±0.182		MG 20:0	0.738	0.292	0.298	0.024*	0.583	0.164	0.945	0.033*	0.624
MG 20:1-%T-lip	0.033 ±0.010	0.043 ±0.022	0.032 ±0.010	0.032 ±0.018	0.014 ±0.008	0.013 ±0.010		MG 20:1	0.48	0.97	0.902	0.196	0.208	0.065	0.048*	0.091	0.030*
MG 20:2-%T-lip	0.011 ±0.002	0.014 ±0.006	0.013 ± 0.003	0.014 ±0.004	0.014 ±0.005	0.010 ±0.003		MG 20:2	0.387	0.597	0.087	0.126	0.859	0.459	0.173	0.715	0.041*
MG 20:3-%T-lip	0.021 ±0.005	0.024 ±0.008	0.020 ±0.005	0.022 ±0.005	0.023 ±0.005	0.019 ±0.005		MG 20:3	0.571	0.506	0.013*	0.375	0.476	0.568	0.159	0.377	0.351
MG 20:4-%T-lip	0.000 ±0.000	0.000 ±0.000	0.000 ±0.000	0.000 ±0.000	0.000 ±0.000	0.000 ±0.000		MG 20:4	0	0	0	0	0	0	0	0	0
MG 22:0-%T-lip	0.006 ±0.002	0.008 ±0.003	0.007 ±0.002	0.007 ±0.001	0.009 ±0.002	0.007 ±0.002		MG 22:0	0.52	0.822	0.074	0.33	0.565	0.144	0.16	0.25	0.426
MG 22:1-%T-lip	0.009 ±0.006	0.011 ±0.002	0.014 ±0.008	0.016 ±0.004	0.007 ±0.005	0.004 ±0.002		MG 22:1	0.664	0.436	0.183	0.098	0.099	0.186	0.001**	0.101	0.007**
MG 22:2-%T-lip	0.026 ±0.005	0.029 ±0.011	0.023 ±0.006	0.028 ±0.005	0.030 ±0.007	0.024 ±0.006		MG 22:2	0.667	0.12	0.020*	0.064	0.869	0.471	0.364	0.209	0.29
MG 22:3-%T-lip	0.000 ±0.000	0.000 ±0.000	0.000 ±0.000	0.000 ±0.000	0.000 ±0.000	0.000 ±0.000		MG 22:3	0	0	0	0	0	0	0	0	0
MG 22:4-%T-lip	0.000 ±0.000	0.000 ±0.000	0.000 ±0.000	0.000 ±0.000	0.000 ±0.000	0.000 ±0.000		MG 22:4	0	0	0	0	0	0	0	0	0
MG 22:5-%T-lip	0.000 ±0.000	0.000 ±0.000	0.000 ±0.000	0.000 ±0.000	0.000 ±0.000	0.000 ±0.000		MG 22:5	0	0	0	0	0	0	0	0	0
MG 22:6-%T-lip	0.006 ±0.001	0.007 ±0.002	0.006 ±0.002	0.006 ±0.001	0.007 ±0.001	0.007 ±0.002		MG 22:6	0.488	0.936	0.913	0.882	0.262	0.871	0.567	0.825	0.574
diacylglycerol lipids (DG)								diacylglycerol lipids (DG)
DG 30:0/14:0-%T-lip	0.0004 ±0.0002	0.0007 ±0.0005	0.0003 ±0.0001	0.0007 ±0.0005	0.0003 ±0.0001	0.0006 ±0.0005		DG 30:0/14:0	0.13	0.15	0.18	0.482	0.561	0.411	0.209	0.752	0.349
DG 30:1/14:0-%T-lip	0.0001 ±0.0001	0.0002 ±0.0002	0.0001 ±0.0000	0.0001 ±0.0001	0.0001 ±0.0000	0.0001 ±0.0001		DG 30:1/14:0	0.55	0.376	0.517	0.201	0.132	0.215	0.093	0.276	0.08
DG 32:0/16:0-%T-lip	0.0019 ±0.0009	0.0043 ±0.0036	0.0020 ±0.0012	0.0037 ±0.0029	0.0014 ±0.0005	0.0034 ±0.0032		DG 32:0/16:0	0.14	0.142	0.218	0.522	0.163	0.186	0.115	0.254	0.632
DG 32:1/16:0-%T-lip	0.0006 ±0.0002	0.0011 ±0.0008	0.0006 ±0.0001	0.0010 ±0.0008	0.0005 ±0.0001	0.0008 ±0.0006		DG 32:1/16:0	0.232	0.276	0.312	0.426	0.218	0.079	0.112	0.097	0.206
DG 32:2/16:1-%T-lip	0.0005 ±0.0002	0.0005 ±0.0004	0.0003 ±0.0001	0.0005 ±0.0004	0.0003 ±0.0001	0.0003 ±0.0002		DG 32:2/16:1	0.828	0.501	0.951	0.119	0.166	0.141	0.075	0.877	0.153
DG 34:0/16:0-%T-lip	0.0015 ±0.0006	0.0026 ±0.0020	0.0018 ±0.0011	0.0024 ±0.0015	0.0015 ±0.0005	0.0021 ±0.0016		DG 34:0/16:0	0.155	0.091	0.396	0.3	0.475	0.817	0.052	0.446	0.098
DG 34:1/16:0-%T-lip	0.0054 ±0.0020	0.0110 ±0.0096	0.0056 ±0.0021	0.0094 ±0.0075	0.0036 ±0.0008	0.0082 ±0.0084		DG 34:1/16:0	0.185	0.196	0.269	0.627	0.154	0.054	0.137	0.041*	0.404
DG 34:2/16:0-%T-lip	0.0043 ±0.0011	0.0093 ±0.0079	0.0039 ±0.0009	0.0079 ±0.0062	0.0030 ±0.0007	0.0066 ±0.0066		DG 34:2/16:0	0.197	0.225	0.294	0.328	0.176	0.025*	0.117	0.026*	0.274
DG 34:2/16:1-%T-lip	0.0034 ±0.0010	0.0045 ±0.0035	0.0029 ±0.0009	0.0041 ±0.0032	0.0021 ±0.0004	0.0030 ±0.0028		DG 34:2/16:1	0.502	0.462	0.546	0.285	0.181	0.031*	0.144	0.044*	0.264
DG 36:0/18:0-%T-lip	0.0028 ±0.0008	0.0043 ±0.0021	0.0034 ±0.0011	0.0041 ±0.0005	0.0044 ±0.0015	0.0037 ±0.0011		DG 36:0/18:0	0.237	0.269	0.265	0.103	0.833	0.149	0.512	0.395	0.574
DG 36:1/18:0-%T-lip	0.0028 ±0.0013	0.0050 ±0.0047	0.0029 ±0.0012	0.0040 ±0.0035	0.0015 ±0.0005	0.0034 ±0.0043		DG 36:1/18:0	0.271	0.37	0.363	0.525	0.154	0.039*	0.145	0.025*	0.515
DG 36:2/18:0-%T-lip	0.0011 ±0.0004	0.0018 ±0.0016	0.0010 ±0.0002	0.0016 ±0.0012	0.0007 ±0.0002	0.0015 ±0.0017		DG 36:2/18:0	0.358	0.299	0.364	0.452	0.262	0.055	0.306	0.013*	0.763
DG 36:2/18:1-%T-lip	0.0274 ±0.0087	0.0451 ±0.0395	0.0279 ±0.0092	0.0370 ±0.0285	0.0156 ±0.0056	0.0309 ±0.0376		DG 36:2/18:1	0.344	0.458	0.438	0.766	0.182	0.009**	0.091	0.012*	0.469
DG 36:3/18:1-%T-lip	0.0187 ±0.0057	0.0320 ±0.0280	0.0170 ±0.0066	0.0278 ±0.0223	0.0108 ±0.0031	0.0212 ±0.0251		DG 36:3/18:1	0.352	0.383	0.435	0.222	0.2	0.006**	0.076	0.021*	0.254
DG 36:4/18:0-%T-lip	0.0000 ±0.0000	0.0000 ±0.0000	0.0000 ±0.0000	0.0000 ±0.0000	0.0000 ±0.0000	0.0000 ±0.0000		DG 36:4/18:0	0.189	0.116	0.411	0.099	0.772	0.789	0.424	0.317	0.295
DG 38:1/18:0-%T-lip	0.0000 ±0.0000	0.0000 ±0.0000	0.0000 ±0.0000	0.0000 ±0.0000	0.0000 ±0.0000	0.0000 ±0.0000		DG 38:1/18:0	0	0	0	0	0	0	0	0	0
DG 38:2/18:0-%T-lip	0.0001 ±0.0000	0.0001 ±0.0000	0.0000 ±0.0000	0.0001 ±0.0000	0.0001 ±0.0000	0.0001 ±0.0000		DG 38:2/18:0	0.169	0.062	0.388	0.161	0.907	0.687	0.943	0.256	0.957
DG 38:2/18:1-%T-lip	0.0003 ±0.0001	0.0005 ±0.0005	0.0003 ±0.0001	0.0005 ±0.0004	0.0002 ±0.0001	0.0004 ±0.0004		DG 38:2/18:1	0.356	0.467	0.437	0.446	0.183	0.023*	0.074*	0.022*	0.087
DG 38:3/18:0-%T-lip	0.0003 ±0.0001	0.0005 ±0.0002	0.0004 ±0.0001	0.0005 ±0.0001	0.0004 ±0.0001	0.0004 ±0.0001		DG 38:3/18:0	0.137	0.246	0.492	0.109	0.883	0.266	0.351	0.762	0.152
DG 38:3/18:1-%T-lip	0.0002 ±0.0001	0.0003 ±0.0003	0.0002 ±0.0001	0.0003 ±0.0002	0.0002 ±0.0001	0.0003 ±0.0003		DG 38:3/18:1	0.432	0.476	0.501	0.767	0.28	0.157	0.448	0.218	0.994
DG 38:4/18:0-%T-lip	0.0001 ±0.0000	0.0001 ±0.0001	0.0002 ±0.0001	0.0001 ±0.0000	0.0001 ±0.0000	0.0001 ±0.0001		DG 38:4/18:0	0.661	0.445	0.951	0.361	0.888	0.87	0.516	0.445	0.438
DG 38:4/18:1-%T-lip	0.0005 ±0.0003	0.0007 ±0.0006	0.0005 ±0.0003	0.0006 ±0.0004	0.0003 ±0.0002	0.0005 ±0.0005		DG 38:4/18:1	0.587	0.665	0.572	0.241	0.22	0.046*	0.158	0.034*	0.305
DG 40:4/18:0-%T-lip	0.0000 ±0.0000	0.0000 ±0.0000	0.0000 ±0.0000	0.0000 ±0.0000	0.0000 ±0.0000	0.0000 ±0.0000		DG 40:4/18:0	0	0	0	0	0	0	0	0	0
DG 40:4/18:1-%T-lip	0.0000 ±0.0000	0.0000 ±0.0000	0.0000 ±0.0000	0.0000 ±0.0000	0.0000 ±0.0000	0.0000 ±0.0000		DG 40:4/18:1	0	0	0	0	0	0	0	0	0
DG 40:5/18:0-%T-lip	0.0000 ±0.0000	0.0000 ±0.0000	0.0000 ±0.0000	0.0000 ±0.0000	0.0000 ±0.0000	0.0000 ±0.0000		DG 40:5/18:0	0.224	0.044*	0.405	0.466	0.855	0.354	0.297	0.078	0.861
DG 40:5/18:1-%T-lip	0.0001 ±0.0001	0.0002 ±0.0001	0.0001 ±0.0001	0.0001 ±0.0001	0.0001 ±0.0000	0.0001 ±0.0001		DG 40:5/18:1	0.628	0.714	0.553	0.987	0.291	0.030*	0.19	0.025*	0.249
DG 40:6/18:0-%T-lip	0.0000 ±0.0000	0.0001 ±0.0000	0.0001 ±0.0000	0.0001 ±0.0000	0.0000 ±0.0000	0.0001 ±0.0000		DG 40:6/18:0	0.898	0.977	0.733	0.22	0.473	0.867	0.972	0.176	0.249
DG 40:6/18:1-%T-lip	0.0002 ±0.0001	0.0003 ±0.0002	0.0002 ±0.0001	0.0003 ±0.0002	0.0001 ±0.0000	0.0002 ±0.0002		DG 40:6/18:1	0.395	0.343	0.404	0.378	0.656	0.045*	0.353	0.039*	0.318
triacylglycerol lipids (TG)								triacylglycerol lipids (TG)
TG 48:0/16:0-%T-lip	0.077 ±0.053	0.153 ±0.137	0.070 ±0.046	0.127 ±0.120	0.044 ±0.023	0.089 ±0.086		TG 48:0/16:0	0.16	0.251	0.209	0.162	0.079	0.076	0.097	0.084	0.133
TG 48:1/16:0-%T-lip	0.120 ±0.070	0.221 ±0.184	0.109 ±0.054	0.166 ±0.139	0.066 ±0.023	0.103 ±0.089		TG 48:1/16:0	0.126	0.269	0.281	0.419	0.097	0.075	0.068	0.056	0.072
TG 50:0/16:0-%T-lip	0.028 ±0.019	0.054 ±0.056	0.023 ±0.014	0.052 ±0.056	0.018 ±0.011	0.046 ±0.060		TG 50:0/16:0	0.272	0.255	0.325	0.249	0.589	0.079	0.588	0.045	0.588
TG 50:1/16:1-%T-lip	0.009 ±0.005	0.013 ±0.012	0.008 ±0.005	0.010 ±0.009	0.005 ±0.002	0.007 ±0.007		TG 50:1/16:1	0.27	0.473	0.41	0.104	0.095	0.046	0.099	0.07	0.142
TG 50:2/16:1-%T-lip	0.185 ±0.097	0.271 ±0.231	0.169 ±0.071	0.196 ±0.157	0.098 ±0.017	0.122 ±0.103		TG 50:2/16:1	0.281	0.635	0.614	0.434	0.118	0.074	0.077	0.046*	0.063
TG 50:3/16:1-%T-lip	0.288 ±0.142	0.462 ±0.420	0.256 ± 0.117	0.316 ±0.269	0.128 ±0.035	0.183 ±0.175		TG 50:3/16:1	0.29	0.583	0.543	0.283	0.125	0.042*	0.095	0.045*	0.079
TG 52:0/18:0-%T-lip	0.006 ±0.004	0.010 ±0.011	0.006 ±0.003	0.009 ±0.010	0.005 ±0.003	0.010 ±0.014		TG 52:0/18:0	0.359	0.378	0.41	0.748	0.698	0.603	0.771	0.504	0.755
TG 52:1/18:0-%T-lip	0.073 ±0.040	0.129 ±0.135	0.062 ±0.035	0.119 ±0.123	0.048 ±0.025	0.099 ±0.128		TG 52:1/18:0	0.335	0.329	0.406	0.198	0.12	0.045*	0.309	0.045*	0.47
TG 52:2/18:0-%T-lip	0.054 ±0.035	0.090 ±0.083	0.051 ±0.033	0.071 ±0.065	0.031 ±0.015	0.051 ±0.054		TG 52:2/18:0	0.315	0.526	0.456	0.444	0.079	0.066	0.12	0.074	0.203
TG 52:3/18:1-%T-lip	1.047 ±0.663	1.655 ±1.312	1.010 ±0.559	1.242 ±1.044	0.557 ±0.193	0.766 ±0.684		TG 52:3/18:1	0.298	0.666	0.57	0.775	0.07	0.1	0.051	0.056	0.064
TG 52:4/18:1-%T-lip	0.209 ±0.124	0.349 ±0.282	0.200 ±0.110	0.246 ±0.194	0.096 ±0.031	0.144 ±0.136		TG 52:4/18:1	0.241	0.629	0.524	0.711	0.08	0.065	0.068	0.052	0.065
TG 52:5/18:1-%T-lip	0.018 ±0.009	0.032 ±0.026	0.015 ±0.007	0.022 ±0.017	0.007 ±0.002	0.013 ±0.012		TG 52:5/18:1	0.202	0.454	0.416	0.267	0.077	0.032*	0.089	0.031*	0.11
TG 52:5/20:4-%T-lip	0.008 ±0.003	0.015 ±0.012	0.008 ±0.005	0.010 ±0.008	0.004 ±0.002	0.006 ±0.006		TG 52:5/20:4	0.315	0.699	0.487	0.853	0.105	0.013*	0.11	0.064	0.12
TG 54:0/18:0-%T-lip	0.001 ±0.001	0.001 ±0.001	0.001 ±0.000	0.001 ±0.001	0.001 ±0.000	0.002 ±0.002		TG 54:0/18:0	0.893	0.377	0.594	0.435	0.492	0.609	0.42	0.399	0.9
TG 54:1/18:0-%T-lip	0.010 ±0.005	0.015 ±0.016	0.008 ±0.004	0.013 ±0.014	0.007 ±0.005	0.014 ±0.019		TG 54:1/18:0	0.485	0.394	0.475	0.216	0.364	0.195	0.809	0.356	0.869
TG 54:2/18:0-%T-lip	0.058 ±0.030	0.079 ±0.074	0.055 ±0.032	0.069 ±0.063	0.038 ±0.020	0.059 ±0.067		TG 54:2/18:0	0.543	0.646	0.523	0.473	0.149	0.024*	0.278	0.034*	0.444
TG 54:3/18:0-%T-lip	0.082 ±0.061	0.104 ±0.082	0.074 ±0.053	0.083 ±0.067	0.045 ±0.023	0.056 ±0.049		TG 54:3/18:0	0.583	0.815	0.694	0.304	0.074	0.101	0.067	0.096	0.089
TG 54:4/18:1-%T-lip	0.408 ±0.306	0.500 ±0.350	0.387 ±0.256	0.376 ±0.278	0.212 ±0.101	0.234 ±0.185		TG 54:4/18:1	0.581	0.947	0.847	0.697	0.069	0.125	0.042*	0.075	0.047*
TG 54:4/20:4-%T-lip	0.003 ±0.001	0.004 ±0.004	0.002 ±0.001	0.003 ±0.003	0.002 ±0.001	0.002 ±0.002		TG 54:4/20:4	0.255	0.498	0.386	0.53	0.07	0.048*	0.091	0.065	0.132
TG 54:5/18:1-%T-lip	0.138 ±0.099	0.200 ±0.155	0.126 ±0.078	0.149 ±0.120	0.063 ±0.028	0.088 ±0.083		TG 54:5/18:1	0.379	0.725	0.593	0.456	0.073	0.085	0.058	0.052	0.059
TG 54:5/20:4-%T-lip	0.035 ±0.010	0.059 ±0.048	0.034 ±0.014	0.046 ±0.038	0.020 ±0.008	0.029 ±0.026		TG 54:5/20:4	0.276	0.57	0.515	0.9	0.071	0.044*	0.076	0.017*	0.091
TG 54:6/18:1-%T-lip	0.030 ±0.018	0.054 ±0.043	0.026 ±0.014	0.037 ±0.028	0.011 ±0.005	0.022 ±0.021		TG 54:6/18:1	0.179	0.433	0.391	0.287	0.083	0.049*	0.106	0.035*	0.141
TG 54:6/20:4-%T-lip	0.028 ±0.007	0.050 ±0.044	0.026 ±0.012	0.036 ±0.033	0.013 ±0.004	0.023 ±0.024		TG 54:6/20:4	0.297	0.588	0.441	0.723	0.077	0.015*	0.093	0.029*	0.119
TG 54:7/18:1-%T-lip	0.003 ±0.002	0.006 ±0.005	0.003 ±0.001	0.004 ±0.003	0.001 ±0.000	0.002 ±0.002		TG 54:7/18:1	0.159	0.404	0.318	0.447	0.132	0.041*	0.121	0.028*	0.116
TG 54:7/20:4-%T-lip	0.006 ±0.002	0.009 ±0.008	0.005 ±0.003	0.006 ±0.005	0.003 ±0.001	0.004 ±0.004		TG 54:7/20:4	0.39	0.723	0.484	0.473	0.126	0.005**	0.126	0.025*	0.129
TG 56:3/18:1-%T-lip	0.009 ±0.004	0.011 ±0.009	0.008 ±0.004	0.010 ±0.007	0.006 ±0.003	0.009 ±0.009		TG 56:3/18:1	0.605	0.76	0.592	0.387	0.09	0.019*	0.218	0.038*	0.601
TG 56:4/18:1-%T-lip	0.012 ±0.006	0.016 ±0.011	0.012 ±0.006	0.012 ±0.009	0.007 ±0.003	0.009 ±0.008		TG 56:4/18:1	0.506	0.874	0.721	0.498	0.054	0.066	0.055	0.040*	0.087
TG 56:4/20:4-%T-lip	0.002 ±0.001	0.003 ±0.003	0.002 ±0.001	0.003 ±0.002	0.001 ±0.000	0.002 ±0.002		TG 56:4/20:4	0.286	0.554	0.476	0.962	0.081	0.035*	0.115	0.026*	0.18
TG 56:5/18:1-%T-lip	0.016 ±0.007	0.022 ±0.016	0.015 ±0.007	0.017 ±0.013	0.009 ±0.003	0.011 ±0.010		TG 56:5/18:1	0.376	0.775	0.643	0.676	0.06	0.051	0.063	0.030*	0.086
TG 56:5/20:4-%T-lip	0.016 ±0.006	0.022 ±0.016	0.016 ±0.007	0.017 ±0.012	0.009 ±0.003	0.012 ±0.009		TG 56:5/20:4	0.312	0.817	0.63	0.923	0.077	0.058	0.071	0.034*	0.081
TG 56:6/20:4-%T-lip	0.024 ±0.007	0.033 ±0.021	0.023 ±0.009	0.026 ±0.017	0.014 ±0.005	0.017 ±0.013		TG 56:6/20:4	0.306	0.812	0.669	0.935	0.059	0.065	0.048	0.022*	0.055
TG 56:7/20:4-%T-lip	0.017 ±0.004	0.024 ±0.017	0.016 ±0.007	0.018 ±0.013	0.008 ±0.003	0.013 ±0.010		TG 56:7/20:4	0.372	0.728	0.483	0.543	0.050*	0.015*	0.065	0.023*	0.093
TG 56:8/20:4-%T-lip	0.007 ±0.002	0.011 ±0.008	0.007 ±0.004	0.008 ±0.006	0.003 ±0.002	0.005 ±0.004		TG 56:8/20:4	0.402	0.763	0.467	0.696	0.117	0.004**	0.115	0.030*	0.119
TG 56:9/20:4-%T-lip	0.002 ±0.001	0.003 ±0.002	0.002 ±0.001	0.002 ±0.001	0.001 ±0.001	0.001 ±0.001		TG 56:9/20:4	0.405	0.823	0.545	0.605	0.125	0.008**	0.126	0.032*	0.129
TG 58:5/20:4-%T-lip	0.000 ±0.000	0.000 ±0.000	0.000 ±0.000	0.000 ±0.000	0.000 ±0.000	0.000 ±0.000		TG 58:5/20:4	0.59	0.296	0.377	0.028*	0.196	0.020*	0.171	0.126	0.407
TG 58:6/20:4-%T-lip	0.001 ±0.000	0.001 ±0.000	0.000 ±0.000	0.001 ±0.000	0.000 ±0.000	0.000 ±0.000		TG 58:6/20:4	0.442	0.85	0.6	0.581	0.276	0.039*	0.021*	0.020*	0.224
TG 58:7/20:4-%T-lip	0.001 ±0.000	0.001 ±0.001	0.001 ±0.000	0.001 ±0.000	0.000 ±0.000	0.000 ±0.000		TG 58:7/20:4	0.256	0.893	0.875	0.616	0.054	0.157	0.032*	0.011*	0.043*
TG 58:8/22:6-%T-lip	0.013 ±0.012	0.016 ±0.011	0.012 ±0.010	0.012 ±0.006	0.006 ±0.004	0.007 ±0.003		TG 58:8/22:6	0.134	0.919	0.573	0.327	0.122	0.1	0.095	0.078	0.077
TG 58:9/22:6-%T-lip	0.010 ±0.009	0.014 ±0.010	0.009 ±0.007	0.010 ±0.006	0.004 ±0.003	0.006 ±0.003		TG 58:9/22:6	0.1	0.853	0.348	0.227	0.125	0.085	0.126	0.075	0.136
TG 60:7/22:6-%T-lip	0.0001 ±0.0000	0.0001 ±0.0001	0.0001 ±0.0000	0.0001 ±0.0000	0.0000 ±0.0000	0.0001 ±0.0000		TG 60:7/22:6	0.009**	0.795	0.249	0.022*	0.046*	0.211	0.067	0.089	0.22
TG 60:8/22:6-%T-lip	0.0002 ±0.0002	0.0003 ±0.0001	0.0002 ±0.0001	0.0002 ±0.0001	0.0001 ±0.0001	0.0001 ±0.0000		TG 60:8/22:6	0.253	0.569	0.884	0.676	0.103	0.256	0.035*	0.048*	0.071
TG 60:9/22:6-%T-lip	0.0003 ±0.0002	0.0004 ±0.0002	0.0003 ±0.0001	0.0003 ±0.0002	0.0002 ±0.0001	0.0002 ±0.0001		TG 60:9/22:6	0.036*	0.161	0.534	0.462	0.463	0.101	0.104	0.017	0.042*
sphingomyelin lipids (SM)	L1CAM-AD	L1CAM-Control	GLAST-AD	GLAST- Control	Tetraspanin-AD	Tetraspanin- Control		sphingomyelin lipids (SM)
SM d18:1/16:0-%T-lip	1.410 ±0.323	1.598 ±0.493	1.615 ±0.142	1.657 ±0.120	1.763 ±0.203	1.729 ±0.302		SM d18:1/16:0	0.564	0.661	0.861	0.079	0.76	0.030*	0.439	0.159	0.536
SM d18:1/16:1-%T-lip	0.089 ±0.015	0.097 ±0.034	0.090 ±0.021	0.101 ±0.017	0.102 ±0.010	0.106 ±0.032		SM d18:1/16:1	0.698	0.534	0.814	0.944	0.693	0.009**	0.414	0.268	0.537
SM d18:1/18:0-%T-lip	0.315 ±0.108	0.326 ±0.092	0.336 ±0.047	0.287 ±0.095	0.372 ±0.070	0.390 ±0.116		SM d18:1/18:0	0.883	0.422	0.831	0.532	0.563	0.069	0.163	0.097	0.121
SM d18:1/18:1-%T-lip	0.083 ±0.025	0.075 ±0.022	0.081 ±0.016	0.073 ±0.018	0.087 ±0.024	0.085 ±0.028		SM d18:1/18:1	0.596	0.614	0.952	0.767	0.794	0.46	0.206	0.258	0.143
SM d18:1/20:0-%T-lip	0.266 ±0.071	0.272 ±0.064	0.255 ±0.026	0.260 ±0.055	0.279 ±0.038	0.314 ±0.086		SM d18:1/20:0	0.901	0.858	0.514	0.73	0.304	0.603	0.134	0.124	0.053
SM d18:1/20:1-%T-lip	0.052 ±0.012	0.048 ±0.012	0.048 ±0.011	0.047 ±0.011	0.051 ±0.011	0.053 ±0.020		SM d18:1/20:1	0.611	0.902	0.83	0.232	0.474	0.479	0.378	0.223	0.214
SM d18:1/22:0-%T-lip	0.307 ±0.109	0.365 ±0.100	0.353 ±0.016	0.371 ±0.039	0.380 ±0.040	0.411 ±0.098		SM d18:1/22:0	0.505	0.485	0.582	0.346	0.877	0.189	0.235	0.158	0.296
SM d18:1/22:1-%T-lip	0.108 ±0.017	0.113 ±0.036	0.119 ±0.011	0.116 ±0.015	0.123 ±0.005	0.121 ±0.032		SM d18:1/22:1	0.818	0.762	0.878	0.105	0.805	0.172	0.433	0.583	0.61
SM d18:1/24:0-%T-lip	0.153 ±0.062	0.211 ±0.078	0.200 ±0.013	0.221 ±0.028	0.222 ±0.039	0.223 ±0.040		SM d18:1/24:0	0.345	0.287	0.97	0.155	0.755	0.086	0.685	0.199	0.931
SM d18:1/24:1-%T-lip	0.210 ±0.058	0.239 ±0.077	0.249 ±0.028	0.252 ±0.014	0.269 ±0.030	0.260 ±0.049		SM d18:1/24:1	0.592	0.806	0.707	0.103	0.669	0.071	0.484	0.248	0.706
SM d18:1/26:0-%T-lip	0.002 ±0.001	0.002 ±0.000	0.002 ±0.001	0.002 ±0.000	0.003 ±0.001	0.003 ±0.001		SM d18:1/26:0	0.865	0.301	0.728	0.835	0.103	0.572	0.208	0.196	0.020*
SM d18:1/26:1-%T-lip	0.003 ±0.001	0.003 ±0.000	0.003 ±0.001	0.003 ±0.000	0.003 ±0.001	0.003 ±0.001		SM d18:1/26:1	0.681	0.35	0.915	0.84	0.145	0.716	0.307	0.216	0.044
dihydrosphingomyelin lipids (dhSM)								dihydrosphingomyelin lipids (dhSM)
dhSM d18:0/16:0-%T-lip	0.036 ±0.003	0.038 ±0.010	0.034 ±0.007	0.036 ±0.004	0.042 ±0.005	0.042 ±0.006		dhSM d18:0/16:0-%T-lip	0.803	0.806	0.981	0.768	0.963	0.024*	0.257	0.053	0.193
dhSM d18:0/16:1-%T-lip	0.005 ±0.001	0.004 ±0.001	0.004 ±0.001	0.004 ±0.001	0.005 ±0.001	0.005 ±0.001		dhSM d18:0/16:1-%T-lip	0.765	0.984	0.945	0.171	0.394	0.922	0.659	0.356	0.35
dhSM d18:0/18:0-%T-lip	0.009 ±0.003	0.008 ±0.003	0.007 ±0.002	0.008 ±0.001	0.010 ±0.003	0.009 ±0.003		dhSM d18:0/18:0-%T-lip	0.602	0.433	0.704	0.514	0.219	0.33	0.304	0.149	0.057
dhSM d18:0/18:1-%T-lip	0.007 ±0.003	0.005 ±0.001	0.005 ±0.001	0.005 ±0.001	0.006 ±0.003	0.006 ±0.001		dhSM d18:0/18:1-%T-lip	0.152	0.199	0.595	0.07	0.13	0.398	0.349	0.248	0.028*
dhSM d18:0/20:0-%T-lip	0.007 ±0.003	0.006 ±0.002	0.005 ±0.001	0.006 ±0.001	0.007 ±0.003	0.006 ±0.002		dhSM d18:0/20:0-%T-lip	0.43	0.134	0.766	0.266	0.099	0.732	0.563	0.359	0.031*
dhSM d18:0/20:1-%T-lip	0.004 ±0.001	0.003 ±0.001	0.002 ±0.001	0.003 ±0.001	0.004 ±0.002	0.003 ±0.001		dhSM d18:0/20:1-%T-lip	0.201	0.164	0.463	0.037	0.27	0.468	0.946	0.269	0.183
dhSM d18:0/22:0-%T-lip	0.007 ±0.003	0.007 ±0.002	0.006 ±0.001	0.006 ±0.001	0.007 ±0.003	0.008 ±0.003		dhSM d18:0/22:0-%T-lip	0.729	0.431	0.567	0.506	0.097	0.861	0.277	0.385	0.024*
dhSM d18:0/22:1-%T-lip	0.015 ±0.005	0.011 ±0.003	0.010 ±0.003	0.011 ±0.003	0.013 ±0.006	0.012 ±0.003		dhSM d18:0/22:1-%T-lip	0.204	0.137	0.61	0.095	0.157	0.41	0.616	0.369	0.038*
dhSM d18:0/24:0-%T-lip	0.003 ±0.001	0.003 ±0.001	0.003 ±0.001	0.002 ±.000	0.003 ±0.001	0.003 ±0.001		dhSM d18:0/24:0-%T-lip	0.776	0.918	0.541	0.453	0.054	0.834	0.563	0.21	0.028*
dhSM d18:0/24:1-%T-lip	0.022 ±0.008	0.021 ±0.004	0.020 ±0.005	0.018 ±0.004	0.021 ±0.007	0.023 ±0.008		dhSM d18:0/24:1-%T-lip	0.685	0.683	0.636	0.271	0.078	0.726	0.479	0.32	0.039*
dhSM d18:0/26:0-%T-lip	0.000 ±0.000	0.000 ±0.000	0.000 ±0.000	0.000 ±0.000	0.000 ±0.000	0.000 ±0.000		dhSM d18:0/26:0-%T-lip	0.209	0.533	0.239	0.284	0.346	0.971	0.86	0.434	0.264
dhSM d18:0/26:1-%T-lip	0.000 ±0.000	0.000 ±0.000	0.000 ±0.000	0.000 ±0.000	0.000 ±0.000	0.000 ±0.000		dhSM d18:0/26:1-%T-lip	0.317	0.633	0.881	0.241	0.071	0.12	0.606	0.029*	0.075
ceramides (Cer)								ceramides (Cer)
Cer d18:1/16:0-%T-lip	0.004 ±0.000	0.003 ±0.002	0.003 ±0.001	0.003 ±0.001	0.004 ±0.001	0.005 ±0.001		Cer d18:1/16:0-%T-lip	0.329	0.182	0.163	0.265	0.799	0.82	0.010**	0.429	0.007**
Cer d18:1/16:1-%T-lip	0.017 ±0.002	0.016 ±0.005	0.018 ±0.007	0.018 ±0.006	0.022 ±0.004	0.018 ±0.005		Cer d18:1/16:1-%T-lip	0.689	0.442	0.152	0.889	0.063	0.012*	0.475	0.311	0.345
Cer d18:1/18:0-%T-lip	0.002 ±0.001	0.002 ±0.001	0.002 ±0.001	0.002 ±0.001	0.003 ±0.000	0.002 ±0.001		Cer d18:1/18:0-%T-lip	0.925	0.484	0.042	0.311	0.769	0.232	0.435	0.051	0.589
Cer d18:1/18:1-%T-lip	0.000 ±0.000	0.000 ±0.000	0.000 ±0.000	0.000 ±0.000	0.000 ±0.000	0.000 ±0.000		Cer d18:1/18:1-%T-lip	0	0	0	0	0	0	0	0	0
Cer d18:1/20:0-%T-lip	0.002 ±0.000	0.001 ±0.001	0.001 ±0.001	0.001 ±0.000	0.001 ±0.001	0.002 ±0.000		Cer d18:1/20:0-%T-lip	0.916	0.499	0.716	0.2	0.958	0.812	0.807	0.804	0.613
Cer d18:1/20:1-%T-lip	0.000 ±0.000	0.000 ±0.000	0.000 ±0.000	0.000 ±0.000	0.001 ±0.000	0.000 ±0.000		Cer d18:1/20:1-%T-lip	0.509	0.376	0.188	0.487	0.931	0.046*	0.162	0.197	0.042*
Cer d18:1/22:0-%T-lip	0.011 ±0.005	0.013 ±0.007	0.010 ±0.004	0.011 ±0.002	0.011 ±0.003	0.014 ±0.005		Cer d18:1/22:0-%T-lip	0.476	0.875	0.327	0.816	0.497	0.746	0.57	0.919	0.137
Cer d18:1/22:1-%T-lip	0.001 ±0.000	0.001 ±0.001	0.001 ±0.000	0.001 ±0.000	0.001 ±0.000	0.001 ±0.000		Cer d18:1/22:1-%T-lip	0.416	0.245	0.465	0.103	0.598	0.344	0.947	0.494	0.271
Cer d18:1/24:0-%T-lip	0.039 ±0.021	0.053 ±0.029	0.043 ±0.021	0.050 ±0.012	0.045 ±0.011	0.060 ±0.023		Cer d18:1/24:0-%T-lip	0.322	0.625	0.164	0.336	0.935	0.311	0.182	0.421	0.123
Cer d18:1/24:1-%T-lip	0.017 ±0.008	0.020 ±0.010	0.017 ±0.008	0.019 ±0.006	0.019 ±0.007	0.022 ±0.008		Cer d18:1/24:1-%T-lip	0.452	0.689	0.535	0.473	0.687	0.074*	0.06	0.946	0.47
Cer d18:1/26:0-%T-lip	0.000 ±0.000	0.000 ±0.000	0.000 ±0.000	0.000 ±0.000	0.000 ±0.000	0.000 ±0.000		Cer d18:1/26:0-%T-lip	0	0	0	0	0	0	0	0	0
Cer d18:1/26:1-%T-lip	0.001 ±0.000	0.001 ±0.000	0.001 ±0.000	0.000 ±0.000	0.001 ±0.000	0.001 ±0.001		Cer d18:1/26:1-%T-lip	0.738	0.458	0.282	0.153	0.62	0.285	0.252	0.422	0.322
dihydroceramides (dhCer)								dihydroceramides (dhCer)
dhCer d18:0/16:0-%T-lip	0.0003 ±0.0002	0.0002 ±0.0001	0.0002 ±0.0001	0.0003 ±0.0001	0.0002 ±0.0001	0.0002 ±0.0001		dhCer d18:0/16:0-%T-lip	0.069	0.475	0.335	0.548	0.91	0.291	0.688	0.488	0.763
dhCer d18:0/16:1-%T-lip	0.0002 ±0.0001	0.0003 ±0.0002	0.0002 ±0.0002	0.0002 ±0.0001	0.0003 ±0.0001	0.0002 ±0.0000		dhCer d18:0/16:1-%T-lip	0.157	0.591	0.262	0.858	0.296	0.1	0.378	0.259	0.608
dhCer d18:0/18:0-%T-lip	0.0002 ±0.0002	0.0002 ±0.0001	0.0003 ±0.0001	0.0002 ±0.0001	0.0002 ±0.0001	0.0002 ±0.0001		dhCer d18:0/18:0-%T-lip	0.983	0.789	0.935	0.967	0.842	0.738	0.683	0.618	0.402
dhCer d18:0/18:1-%T-lip	0.0003 ±0.0002	0.0001 ±0.0001	0.0002 ±0.0001	0.0002 ±0.0001	0.0001 ±0.0000	0.0003 ±0.0002		dhCer d18:0/18:1-%T-lip	0.27	0.606	0.061	0.677	0.586	0.147	0.12	0.047*	0.341
dhCer d18:0/20:0-%T-lip	0.0001 ±0.0000	0.0001 ±0.0001	0.0001 ±0.0001	0.0002 ±0.0001	0.0001 ±0.0001	0.0001 ±0.0001		dhCer d18:0/20:0-%T-lip	0.47	0.014	0.536	0.036*	0.136	0.429	0.864	0.282	0.113
dhCer d18:0/20:1-%T-lip	0.0001 ±0.0001	0.0001 ±0.0001	0.0000 ±0.0000	0.0000 ±0.0000	0.0001 ±0.0000	0.0001 ±0.0000		dhCer d18:0/20:1-%T-lip	0.824	0.917	0.606	0.192	0.129	0.537	0.385	0.158	0.629
dhCer d18:0/22:0-%T-lip	0.0003 ±0.0002	0.0005 ±0.0003	0.0005 ±0.0002	0.0006 ±0.0001	0.0006 ±0.0004	0.0007 ±0.0002		dhCer d18:0/22:0-%T-lip	0.177	0.813	0.658	0.086	0.213	0.024*	0.054	0.997	0.737
dhCer d18:0/22:1-%T-lip	0.0007 ±0.0002	0.0007 ±0.0004	0.0004 ±0.0001	0.0005 ±0.0001	0.0006 ±0.0002	0.0007 ±0.0003		dhCer d18:0/22:1-%T-lip	0.852	0.101	0.762	0.048*	0.675	0.854	0.943	0.411	0.584
dhCer d18:0/24:0-%T-lip	0.0012 ±0.0002	0.0016 ±0.0007	0.0016 ±0.0007	0.0018 ±0.0002	0.0016 ±0.0005	0.0020 ±0.0007		dhCer d18:0/24:0-%T-lip	0.374	0.633	0.388	0.005**	0.247	0.102	0.046*	0.411	0.807
dhCer d18:0/24:1-%T-lip	0.0007 ±0.0003	0.0010 ±0.0004	0.0010 ±0.0004	0.0012 ±0.0002	0.0010 ±0.0003	0.0012 ±0.0004		dhCer d18:0/24:1-%T-lip	0.194	0.818	0.643	0.067	0.486	0.151	0.244	0.554	0.743
dhCer d18:0/26:0-%T-lip	0.0000 ±0.0000	0.0000 ±0.0000	0.0000 ±0.0000	0.0000 ±0.0000	0.0000 ±0.0000	0.0000 ±0.0000		dhCer d18:0/26:0-%T-lip	0	0	0	0	0	0	0	0	0
dhCer d18:0/26:1-%T-lip	0.0000 ±0.0000	0.0000 ±0.0000	0.0000 ±0.0000	0.0000 ±0.0000	0.0000 ±0.0000	0.0000 ±0.0000		dhCer d18:0/26:1-%T-lip	0	0	0	0	0	0	0	0	0
sulfatide lipids (sulf)								sulfatide lipids (sulf)
Sulf d18:0/16:0-%T-lip	0.0015 ±0.0004	0.0011 ±0.0003	0.0011 ±0.0003	0.0015 ±0.0004	0.0016 ±0.0005	0.0016 ±0.0005		Sulf d18:0/16:0-%T-lip	0.135	0.25	0.957	0.687	0.348	0.532	0.071	0.509	0.051
Sulf d18:0/18:0-%T-lip	0.0004 ±0.0002	0.0004 ±0.0001	0.0005 ±0.0001	0.0005 ±0.0001	0.0005 ±0.0001	0.0005 ±0.0001		Sulf d18:0/18:0-%T-lip	0.913	0.9	0.762	0.16	0.153	0.171	0.023*	0.396	0.182
Sulf d18:0/20:0-%T-lip	0.0002 ±0.0000	0.0002 ±0.0001	0.0002 ±0.0001	0.0002 ±0.0001	0.0003 ±0.0001	0.0002 ±0.0001		Sulf d18:0/20:0-%T-lip	0.891	0.443	0.462	0.091	0.721	0.065	0.066	0.153	0.225
Sulf d18:0/22:0-%T-lip	0.0018 ±0.0001	0.0020 ±0.0007	0.0020 ±0.0006	0.0020 ±0.0002	0.0025 ±0.0002	0.0022 ±0.0004		Sulf d18:0/22:0-%T-lip	0.64	0.506	0.061	0.12	0.591	0.010**	0.327	0.027*	0.537
Sulf d18:0/24:0-%T-lip	0.0017 ±0.0003	0.0017 ±0.0004	0.0016 ±0.0003	0.0018 ±0.0004	0.0021 ±0.0005	0.0025 ±0.0006		Sulf d18:0/24:0-%T-lip	0.799	0.994	0.321	0.749	0.291	0.197	0.047*	0.16	0.026*
Sulf d18:0/26:0-%T-lip	0.0003 ±0.0001	0.0003 ±0.0001	0.0003 ±0.0000	0.0003 ±0.0001	0.0003 ±0.0000	0.0003 ±0.0001		Sulf d18:0/26:0-%T-lip	0.784	0.067	0.738	0.046	0.368	0.145	0.271	0.46	0.213
Sulf d18:1/16:0-%T-lip	0.0068 ±0.0016	0.0055 ±0.0014	0.0056 ±0.0020	0.0067 ±0.0019	0.0076 ±0.0014	0.0085 ±0.0022		Sulf d18:1/16:0-%T-lip	0.134	0.524	0.53	0.664	0.122	0.338	0.034*	0.17	0.031*
Sulf d18:1/16:1-%T-lip	0.0008 ±0.0001	0.0008 ±0.0003	0.0007 ±0.0003	0.0008 ±0.0001	0.0010 ±0.0001	0.0011 ±0.0005		Sulf d18:1/16:1-%T-lip	0.781	0.887	0.609	0.464	0.603	0.020*	0.086	0.033*	0.055
Sulf d18:1/18:0-%T-lip	0.0014 ±0.0002	0.0015 ±0.0006	0.0015 ±0.0004	0.0016 ±0.0002	0.0019 ±0.0002	0.0017 ±0.0004		Sulf d18:1/18:0-%T-lip	0.567	0.795	0.272	0.103	0.871	0.010*	0.206	0.1	0.106
Sulf d18:1/18:1-%T-lip	0.0003 ±0.0000	0.0003 ±0.0001	0.0002 ±0.0001	0.0003 ±0.0001	0.0003 ±0.0001	0.0003 ±0.0001		Sulf d18:1/18:1-%T-lip	0.346	0.593	0.775	0.018*	0.62	0.635	0.083	0.148	0.032*
Sulf d18:1/20:0-%T-lip	0.0004 ±0.0000	0.0004 ±0.0001	0.0004 ±0.0001	0.0004 ±0.0001	0.0005 ±0.0001	0.0004 ±0.0001		Sulf d18:1/20:0-%T-lip	0.686	0.145	0.224	0.234	0.489	0.015*	0.849	0.030*	0.383
Sulf d18:1/20:1-%T-lip	0.0003 ±0.0001	0.0002 ±0.0001	0.0003 ±0.0001	0.0003 ±0.0001	0.0003 ±0.0001	0.0003 ±0.0001		Sulf d18:1/20:1-%T-lip	0.2	0.667	0.665	0.919	0.429	0.358	0.046*	0.371	0.582
Sulf d18:1/22:0-%T-lip	0.0016 ±0.0001	0.0014 ±0.0003	0.0015 ±0.0003	0.0018 ±0.0003	0.0018 ±0.0006	0.0020 ±0.0005		Sulf d18:1/22:0-%T-lip	0.203	0.08	0.543	0.21	0.807	0.523	0.046*	0.899	0.035*
Sulf d18:1/22:1-%T-lip	0.0009 ±0.0001	0.0008 ±0.0003	0.0008 ±0.0002	0.0008 ±0.0001	0.0008 ±0.0004	0.0010 ±0.0003		Sulf d18:1/22:1-%T-lip	0.575	0.529	0.512	0.807	0.998	0.754	0.009**	0.809	0.039*
Sulf d18:1/24:0-%T-lip	0.0027 ±0.0001	0.0029 ±0.0007	0.0032 ±0.0008	0.0031 ±0.0007	0.0039 ±0.0005	0.0040 ±0.0006		Sulf d18:1/24:0-%T-lip	0.59	0.592	0.81	0.248	0.993	0.004**	0.010*	0.095	0.057
Sulf d18:1/24:1-%T-lip	0.0047 ±0.0004	0.0052 ±0.0014	0.0052 ±0.0016	0.0052 ±0.0009	0.0064 ±0.0010	0.0062 ±0.0011		Sulf d18:1/24:1-%T-lip	0.551	0.738	0.872	0.333	0.754	0.015*	0.013*	0.188	0.048*
Sulf d18:1/26:0-%T-lip	0.0002 ±0.0000	0.0002 ±0.0000	0.0002 ±0.0000	0.0002 ±0.0001	0.0002 ±0.0001	0.0003 ±0.0000		Sulf d18:1/26:0-%T-lip	0.634	0.99	0.715	0.105	0.393	0.277	0.078	0.856	0.435
Sulf d18:1/26:1-%T-lip	0.0002 ±0.0000	0.0001 ±0.0000	0.0002 ±0.0000	0.0002 ±0.0000	0.0002 ±0.0000	0.0002 ±0.0001		Sulf d18:1/26:1-%T-lip	0.175	0.323	0.525	0.626	0.027	0.109	0.075	0.232	0.782
phosphatidylcholine lipids (PC)								phosphatidylcholine lipids (PC)
PC 30:0-%T-lip	0.08 ±0.05	0.06 ±0.03	0.06 ±0.03	0.06 ±0.03	0.07 ±0.04	0.06 ±0.02		PC 30:0-%T-lip	0.468	0.488	0.689	0.125	0.053	0.205	0.621	0.205	0.073
PC 32:0-%T-lip	0.34 ±0.13	0.32 ±0.05	0.29 ±0.06	0.28 ±0.07	0.31 ±0.08	0.33 ±0.07		PC 32:0-%T-lip	0.822	0.721	0.821	0.148	0.002**	0.466	0.88	0.064	0.062
PC 32:1-%T-lip	0.17 ±0.06	0.12 ±0.08	0.12 ±0.06	0.14 ±0.05	0.14 ±0.04	0.12 ±0.06		PC 32:1-%T-lip	0.35	0.576	0.49	0.025*	0.026*	0.072	0.496	0.347	0.484
PC 34:0-%T-lip	0.08 ±0.02	0.08 ±0.02	0.08 ±0.02	0.08 ±0.02	0.09 ±0.01	0.08 ±0.02		PC 34:0-%T-lip	0.698	0.617	0.033*	0.259	0.527	0.086	0.48	0.166	0.971
PC 34:1-%T-lip	0.58 ±0.10	0.61 ±0.17	0.58 ±0.14	0.57 ±0.11	0.67 ±0.07	0.56 ±0.13		PC 34:1-%T-lip	0.595	0.978	0.041*	0.704	0.413	0.164	0.182	0.198	0.708
PC 34:2-%T-lip	0.95 ±0.15	1.17 ±0.40	1.00 ±0.26	0.92 ±0.21	1.02 ±0.06	1.01 ±0.26		PC 34:2-%T-lip	0.344	0.532	0.931	0.449	0.161	0.357	0.088	0.365	0.815
PC 36:0-%T-lip	0.01 ±0.00	0.01 ±0.00	0.01 ±0.00	0.01 ±0.00	0.01 ±0.00	0.01 ±0.00		PC 36:0-%T-lip	0.705	0.582	0.044*	0.266	0.678	0.211	0.161	0.221	0.34
PC 36:1-%T-lip	0.13 ±0.03	0.14 ±0.04	0.13 ±0.03	0.13 ±0.03	0.15 ±0.03	0.12 ±0.03		PC 36:1-%T-lip	0.387	0.842	0.036*	0.698	0.34	0.258	0.137	0.267	0.442
PC 36:2-%T-lip	0.54 ±0.12	0.65 ±0.22	0.59 ±0.15	0.55 ±0.09	0.63 ±0.04	0.55 ±0.14		PC 36:2-%T-lip	0.375	0.51	0.208	0.902	0.312	0.211	0.172	0.184	0.221
PC 36:3-%T-lip	0.28 ±0.03	0.33 ±0.12	0.29 ±0.08	0.28 ±0.06	0.32 ±0.04	0.26 ±0.07		PC 36:3-%T-lip	0.284	0.591	0.167	0.909	0.315	0.181	0.085	0.356	0.025*
PC 36:4-%T-lip	0.44 ±0.08	0.56 ±0.20	0.45 ±0.16	0.44 ±0.09	0.53 ±0.11	0.44 ±0.11		PC 36:4-%T-lip	0.171	0.279	0.23	0.833	0.375	0.145	0.088	0.209	0.109
PC 38:0-%T-lip	0.05 ±0.01	0.05 ±0.01	0.05 ±0.01	0.04 ±0.01	0.04 ±0.01	0.05 ±0.01		PC 38:0-%T-lip	0.997	0.544	0.379	0.015*	0.049*	0.057	*0.651	0.859	0.228
PC 38:1-%T-lip	0.01 ±0.00	0.01 ±0.00	0.00 ±0.00	0.00 ±0.00	0.00 ±0.00	0.01 ±0.00		PC 38:1-%T-lip	0.808	0.222	0.221	0.078	0.019*	0.038*	0.005**	0.274	0.991
PC 38:2-%T-lip	0.03 ±0.00	0.03 ±0.01	0.03 ±0.00	0.02 ±0.00	0.03 ±0.00	0.03 ±0.01		PC 38:2-%T-lip	0.277	0.401	0.419	0.4	0.256	0.391	0.146	0.301	0.414
PC 38:3-%T-lip	0.12 ±0.03	0.14 ±0.05	0.13 ±0.04	0.13 ±0.03	0.14 ±0.02	0.12 ±0.03		PC 38:3-%T-lip	0.301	0.853	0.040*	0.367	0.432	0.219	0.15	0.268	0.108
PC 38:4-%T-lip	0.34 ±0.08	0.41 ±0.16	0.36 ±0.12	0.37 ±0.08	0.41 ±0.13	0.34 ±0.09		PC 38:4-%T-lip	0.261	0.963	0.258	0.142	0.482	0.34	0.171	0.493	0.125
PC 38:5-%T-lip	0.19 ±0.03	0.20 ±0.06	0.18 ±0.05	0.18 ±0.03	0.21 ±0.03	0.17 ±0.05		PC 38:5-%T-lip	0.747	0.73	0.169	0.615	0.788	0.23	0.285	0.242	0.066
PC 38:6-%T-lip	0.24 ±0.07	0.28 ±0.09	0.27 ±0.08	0.24 ±0.07	0.27 ±0.06	0.24 ±0.07		PC 38:6-%T-lip	0.551	0.58	0.549	0.749	0.613	0.091	0.126	0.246	0.116
PC 40:4-%T-lip	0.02 ±0.01	0.02 ±0.01	0.02 ±0.01	0.02 ±0.01	0.02 ±0.00	0.02 ±0.00		PC 40:4-%T-lip	0.636	0.841	0.236	0.458	0.767	0.252	0.396	0.266	0.401
PC 40:5-%T-lip	0.07 ±0.02	0.06 ±0.02	0.06 ±0.02	0.07 ±0.02	0.07 ±0.01	0.06 ±0.02		PC 40:5-%T-lip	0.582	0.482	0.388	0.888	0.631	0.917	0.191	0.983	0.496
PC 40:6-%T-lip	0.19 ±0.05	0.18 ±0.05	0.18 ±0.05	0.17 ±0.04	0.18 ±0.04	0.18 ±0.05		PC 40:6-%T-lip	0.847	0.975	0.955	0.15	0.545	0.327	0.472	0.511	0.85
PC 40:7-%T-lip	0.04 ±0.01	0.03 ±0.01	0.03 ±0.01	0.03 ±0.01	0.03 ±0.01	0.03 ± 0.01		PC 40:7-%T-lip	0.225	0.742	0.626	0.016*	0.037*	0.040*	0.119	0.321	0.968
PC 42:5-%T-lip	0.00 ±0.00	0.00 ±0.00	0.00 ±0.00	0.00 ±0.00	0.00 ±0.00	0.00 ±0.00		PC 42:5-%T-lip	0.544	0.983	0.898	0.132	0.053	0.163	0.426	0.575	0.501
PC 42:6-%T-lip	0.00 ±0.00	0.00 ±0.00	0.00 ±0.00	0.00 ±0.00	0.00 ±0.00	0.00 ±0.00		PC 42:6-%T-lip	0.314	0.688	0.966	0.055	0.063	0.069	0.524	0.848	0.739
PC 42:7-%T-lip	0.00 ±0.00	0.00 ±0.00	0.00 ±0.00	0.00 ±0.00	0.00 ±0.00	0.00 ±0.00		PC 42:7-%T-lip	0.196	0.73	0.805	0.039*	0.046	0.043*	0.417	0.992	0.422
ether phosphatidylcholine lipids (PCe								ether phosphatidylcholine lipids (PCe)
PCe 30:0-%T-lip	0.01 ±0.00	0.01 ±0.00	0.01 ±0.00	0.01 ±0.00	0.01 ±0.00	0.01 ±0.00		PCe 30:0-%T-lip	0.435	0.698	0.525	0.072	0.022	0.245	0.36	0.126	0.101
PCe 32:0-%T-lip	0.04 ±0.02	0.04 ±0.01	0.03 ±0.01	0.03 ±0.01	0.04 ±0.02	0.04 ±0.01		PCe 32:0-%T-lip	0.491	0.666	0.737	0.102	0.004**	0.679	0.661	0.016*	0.062
PCe 32:1-%T-lip	0.03 ±0.01	0.03 ±0.01	0.03 ±0.01	0.02 ±0.01	0.03 ±0.01	0.03 ±0.01		PCe 32:1-%T-lip	0.764	0.843	0.487	0.072	0.004**	0.492	0.64	0.133	0.071
PCe 34:0-%T-lip	0.02 ±0.01	0.01 ±0.00	0.01 ±0.01	0.02 ±0.01	0.02 ±0.01	0.01 ±0.00		PCe 34:0-%T-lip	0.341	0.291	0.33	0.104	0.028*	0.887	0.597	0.074	0.075
PCe 34:1-%T-lip	0.04 ±0.01	0.03 ±0.01	0.04 ±0.01	0.04 ±0.01	0.04 ±0.01	0.03 ±0.00		PCe 34:1-%T-lip	0.405	0.381	0.124	0.114	0.143	0.781	0.057	0.261	0.682
PCe 34:2-%T-lip	0.03 ±0.01	0.04 ±0.01	0.03 ±0.01	0.03 ±0.01	0.03 ±0.01	0.03 ±0.01		PCe 34:2-%T-lip	0.444	0.549	0.969	0.603	0.369	0.238	0.065	0.215	0.799
PCe 36:0-%T-lip	0.00 ±0.00	0.00 ±0.00	0.00 ±0.00	0.00 ±0.00	0.00 ±0.00	0.00 ±0.00		PCe 36:0-%T-lip	0.459	0.747	0.004**	0.702	0.365	0.042*	0.297	0.024*	0.877
PCe 36:1-%T-lip	0.01 ±0.00	0.01 ±0.00	0.01 ±0.00	0.02 ±0.00	0.02 ±0.00	0.01 ±0.00		PCe 36:1-%T-lip	0.275	0.12	0.021*	0.716	0.777	0.221	0.243	0.192	0.314
PCe 36:2-%T-lip	0.03 ±0.00	0.04 ±0.01	0.03 ±0.01	0.03 ±0.00	0.04 ±0.00	0.03 ±0.01		PCe 36:2-%T-lip	0.574	0.982	0.138	0.262	0.135	0.254	0.010**	0.171	0.182
PCe 36:3-%T-lip	0.02 ±0.00	0.03 ±0.01	0.03 ±0.01	0.02 ±0.01	0.03 ±0.00	0.03 ±0.01		PCe 36:3-%T-lip	0.343	0.384	0.735	0.567	0.411	0.048*	0.041*	0.087	0.367
PCe 36:4-%T-lip	0.04 ±0.01	0.06 ±0.02	0.05 ±0.01	0.04 ±0.01	0.05 ±0.00	0.05 ±0.01		PCe 36:4-%T-lip	0.239	0.212	0.831	0.378	0.475	0.225	0.178	0.216	0.502
PCe 38:0-%T-lip	0.01 ±0.00	0.01 ±0.00	0.01 ±0.00	0.01 ±0.00	0.01 ±0.00	0.01 ±0.00		PCe 38:0-%T-lip	0.516	0.449	0.34	0.498	0.627	0.165	0.239	0.18	0.304
PCe 38:1-%T-lip	0.0026 ±0.0005	0.0032 ±0.0008	0.0029 ±0.0004	0.0031 ±0.0005	0.0036 ±0.0007	0.0029 ±0.0005		PCe 38:1-%T-lip	0.275	0.457	0.092	0.049*	0.794	0.062	0.409	0.125	0.326
PCe 38:2-%T-lip	0.01 ±0.00	0.01 ±0.00	0.01 ±0.00	0.01 ±0.00	0.01 ±0.00	0.01 ±0.00		PCe 38:2-%T-lip	0.283	0.393	0.182	0.618	0.531	0.13	0.291	0.132	0.604
PCe 38:3-%T-lip	0.02 ±0.00	0.02 ±0.00	0.02 ±0.00	0.02 ±0.00	0.02 ±0.00	0.02 ±0.00		PCe 38:3-%T-lip	0.251	0.218	0.151	0.606	0.504	0.192	0.206	0.084	0.71
PCe 38:4-%T-lip	0.06 ±0.01	0.06 ±0.01	0.06 ±0.02	0.06 ±0.02	0.06 ±0.01	0.06 ±0.01		PCe 38:4-%T-lip	0.128	0.27	0.807	0.639	0.703	0.625	0.252	0.559	0.549
PCe 38:5-%T-lip	0.09 ±0.02	0.10 ±0.02	0.09 ±0.00	0.07 ±0.02	0.08 ±0.01	0.09 ±0.02		PCe 38:5-%T-lip	0.336	0.228	0.206	0.074	0.259	0.112	0.063	0.763	0.562
PCe 38:6-%T-lip	0.03 ±0.00	0.04 ±0.01	0.04 ±0.01	0.03 ±0.01	0.03 ±0.01	0.03 ±0.01		PCe 38:6-%T-lip	0.388	0.381	0.508	0.196	0.192	0.467	0.025*	0.624	0.578
PCe 40:4-%T-lip	0.02 ±0.01	0.02 ±0.00	0.01 ±0.00	0.01 ±0.00	0.02 ±0.00	0.02 ±0.00		PCe 40:4-%T-lip	0.516	0.326	0.308	0.325	0.059	0.936	0.505	0.108	0.503
PCe 40:5-%T-lip	0.02 ±0.01	0.02 ±0.00	0.02 ±0.01	0.02 ±0.01	0.02 ±0.01	0.02 ±0.00		PCe 40:5-%T-lip	0.951	0.672	0.135	0.114	0.008**	0.367	0.768	0.426	0.177
PCe 40:6-%T-lip	0.03 ±0.01	0.03 ±0.00	0.03 ±0.00	0.03 ±0.01	0.03 ±0.01	0.03 ±0.01		PCe40:6-%T-lip	0.848	0.711	0.51	0.057	0.031*	0.088	0.502	0.85	0.401
PCe 40:7-%T-lip	0.053 ±0.011	0.053 ±0.009	0.039 ±0.013	0.04 ±0.005	0.039 ±0.013	0.049 ±0.014		PCe 40:7-%T-lip	0.946	0.544	0.395	0.018*	0.044*	0.065	0.593	0.853	0.261
PCe 42:5-%T-lip	0.01 ±0.01	0.01 ±0.00	0.01 ±0.00	0.01 ±0.00	0.01 ±0.00	0.01 ±0.00		PCe 42:5-%T-lip	0.941	0.268	0.145	0.135	0.049*	0.26	0.452	0.301	0.25
PCe 42:6-%T-lip	0.01 ±0.01	0.01 ±0.00	0.01 ±0.00	0.01 ±3	0.01 ±0.00	0.01 ± 0.00		PCe 42:6-%T-lip	0.968	0.411	0.077	0.096	0.027*	0.153	0.337	0.988	0.183
PCe 42:7-%T-lip	0.00 ±0.00	0.01 ±0.00	0.00 ±0.00	0.00 ±0.00	0.00 ±0.00	0.00 ±0.00		PCe 42:7-%T-lip	0.902	0.258	0.123	0.038	0.071	0.093	0.48	0.913	0.392
phosphatidylethanolamine lipids (PE)								phosphatidylethanolamine lipids (PE)
PE 30:0-%T-lip	0.005 ±0.002	0.004 ±0.002	0.005 ±0.001	0.004 ±0.001	0.004 ±0.002	0.003 ±0.002		PE 30:0-%T-lip	0.348	0.835	0.748	0.195	0.796	0.374	0.531	0.799	0.452
PE 32:0-%T-lip	0.003 ±0.002	0.004 ±0.002	0.002 ±0.002	0.001 ±0.002	0.005 ±0.003	0.003 ±0.002		PE 32:0-%T-lip	0.045	0.954	0.473	0.369	0.041*	0.221	0.374	0.026*	0.012*
PE 32:1-%T-lip	0.004 ±0.001	0.003 ±0.002	0.003 ±0.002	0.003 ±0.002	0.002 ±0.001	0.003 ±0.003		PE 32:1-%T-lip	0.633	0.895	0.485	0.81	0.452	0.095	0.902	0.438	0.803
PE 34:0-%T-lip	0.003 ±0.001	0.005 ±0.003	0.003 ±0.001	0.003 ±0.001	0.003 ±0.002	0.004 ±0.003		PE 34:0-%T-lip	0.12	0.574	0.698	0.41	0.774	0.68	0.828	0.958	0.996
PE 34:1-%T-lip	0.018 ±0.004	0.019 ±0.014	0.013 ±0.007	0.013 ±0.007	0.017 ±0.005	0.017 ±0.012		PE 34:1-%T-lip	0.968	0.461	0.954	0.28	0.95	0.556	0.629	0.47	0.572
PE 34:2-%T-lip	0.024 ±0.007	0.024 ±0.011	0.019 ±0.012	0.021 ±0.010	0.017 ±0.006	0.023 ±0.008		PE 34:2-%T-lip	0.942	0.76	0.195	0.651	0.93	0.014*	0.787	0.364	0.762
PE 36:0-%T-lip	0.107 ±0.015	0.123 ±0.038	0.092 ±0.041	0.075 ±0.023	0.078 ±0.014	0.115 ±0.042		PE 36:0-%T-lip	0.463	0.026*	0.163	0.050*	0.864	0.001**	0.671	0.692	0.367
PE 36:1-%T-lip	0.027 ±0.005	0.023 ±0.010	0.015 ±0.006	0.014 ±0.004	0.016 ±0.005	0.022 ±0.011		PE 36:1-%T-lip	0.495	0.399	0.271	0.008**	0.162	0.020*	0.721	0.246	0.565
PE 36:2-%T-lip	0.067 ±0.014	0.071 ±0.036	0.053 ±0.032	0.058 ±0.027	0.050 ±0.018	0.061 ±0.032		PE 36:2-%T-lip	0.788	0.927	0.551	0.28	0.145	0.245	0.401	0.664	0.847
PE 36:3-%T-lip	0.019 ±0.005	0.017 ±0.007	0.012 ±0.003	0.014 ±0.004	0.011 ±0.002	0.013 ±0.010		PE 36:3-%T-lip	0.445	0.98	0.641	0.32	0.212	0.007**	0.193	0.282	0.599
PE 36:4-%T-lip	0.030 ±0.009	0.029 ±0.011	0.018 ±0.007	0.023 ±0.012	0.023 ±0.005	0.022 ±0.008		PE 36:4-%T-lip	0.847	0.992	0.697	0.268	0.020*	0.089	0.071	0.957	0.587
PE 38:0-%T-lip	0.134 ±0.023	0.141 ±0.032	0.114 ±0.047	0.106 ±0.034	0.093 ±0.010	0.126 ±0.034		PE 38:0-%T-lip	0.76	0.184	0.059	0.18	0.13	0.006**	0.227	0.433	0.837
PE 38:1-%T-lip	0.041 ±0.011	0.050 ±0.013	0.039 ±0.019	0.033 ±0.012	0.029 ±0.008	0.039 ±0.013		PE 38:1-%T-lip	0.341	0.030*	0.328	0.041*	0.815	0.010**	0.005**	0.474	0.118
PE 38:2-%T-lip	0.007 ±0.002	0.009 ±0.004	0.006 ±0.002	0.006 ±0.001	0.009 ±0.003	0.010 ±0.006		PE 38:2-%T-lip	0.293	0.578	0.597	0.395	0.056	0.316	0.747	0.149	0.435
PE 38:3-%T-lip	0.025 ±0.007	0.019 ±0.007	0.013 ±0.003	0.015 ±0.003	0.016 ±0.005	0.017 ±0.004		PE 38:3-%T-lip	0.193	0.751	0.749	0.065	0.08	0.039*	0.491	0.634	0.557
PE 38:4-%T-lip	0.122 ±0.020	0.093 ±0.030	0.064 ±0.021	0.081 ±0.030	0.078 ±0.020	0.087 ±0.036		PE 38:4-%T-lip	0.125	0.897	0.557	0.07	0.119	0.010*	0.562	0.904	0.797
PE 38:5-%T-lip	0.037 ±0.008	0.027 ±0.009	0.020 ±0.006	0.023 ±0.006	0.029 ±0.007	0.025 ±0.007		PE 38:5-%T-lip	0.105	0.835	0.505	0.085	0.455	0.092	0.082	0.35	0.997
PE 38:6-%T-lip	0.051 ±0.017	0.047 ±0.016	0.030 ±0.016	0.039 ±0.023	0.041 ±0.019	0.034 ±0.010		PE 38:6-%T-lip	0.79	0.972	0.542	0.24	0.187	0.057	0.076	0.751	0.213
PE 40:4-%T-lip	0.010 ±0.002	0.010 ±0.005	0.008 ±0.003	0.010 ±0.003	0.011 ±0.002	0.012 ±0.001		PE 40:4-%T-lip	0.854	0.998	0.289	0.84	0.98	0.742	0.363	0.259	0.162
PE 40:5-%T-lip	0.015 ±0.003	0.013 ±0.004	0.011 ±0.004	0.012 ±0.003	0.014 ±0.002	0.016 ±0.004		PE 40:5-%T-lip	0.321	0.755	0.213	0.149	0.082	0.251	0.232	0.307	0.008**
PE 40:6-%T-lip	0.048 ±0.010	0.049 ±0.015	0.039 ±0.014	0.042 ±0.012	0.044 ±0.004	0.045 ±0.009		PE 40:6-%T-lip	0.923	0.943	0.787	0.395	0.086	0.401	0.472	0.808	0.491
PE 40:7-%T-lip	0.010 ±0.004	0.011 ±0.004	0.008 ±0.003	0.010 ±0.002	0.012 ±0.004	0.011 ±0.003		PE 40:7-%T-lip	0.853	0.231	0.133	0.684	0.098	0.424	0.819	0.272	0.477
PE 42:5-%T-lip	0.019 ±0.010	0.017 ±0.006	0.015 ±0.008	0.013 ±0.005	0.017 ±0.011	0.017 ±0.007		PE 42:5-%T-lip	0.782	0.351	0.953	0.214	0.716	0.242	0.831	0.313	0.545
PE 42:6-%T-lip	0.006 ±0.003	0.005 ±0.001	0.005 ±0.001	0.004 ±0.002	0.007 ±0.003	0.009 ±0.004		PE 42:6-%T-lip	0.575	0.783	0.433	0.156	0.354	0.73	0.163	0.192	0.027*
PE 42:7-%T-lip	0.005 ±0.002	0.005 ±0.002	0.004 ±0.003	0.005 ±0.003	0.004 ±0.002	0.007 ±0.003		PE 42:7-%T-lip	0.86	0.95	0.08	0.942	0.79	0.643	0.27	0.733	0.284
plasmalogen phosphatidylethanolamine lipids (PEp)								plasmalogen phosphatidylethanolamine lipids (PEp)
PEp 30:0-%T-lip	0.00 ±0.00	0.00 ±0.00	0.00 ±0.00	0.00 ±0.00	0.00 ±0.00	0.00 ±0.00		PEp 30:0-%T-lip	0	0	0	0	0	0	0	0	0
PEp 32:0-%T-lip	0.00 ±0.00	0.00 ±0.00	0.00 ±0.00	0.00 ±0.00	0.00 ±0.00	0.00 ±0.00		PEp 32:0-%T-lip	0	0	0	0	0	0	0	0	0
PEp 32:1-%T-lip	0.00 ±0.00	0.00 ±0.00	0.00 ±0.00	0.00 ±0.00	0.00 ±0.00	0.00 ±0.00		PEp 32:1-%T-lip	0	0	0	0	0	0	0	0	0
PEp 34:0-%T-lip	0.00 ±0.00	0.00 ±0.00	0.00 ±0.00	0.00 ±0.00	0.00 ±0.00	0.00 ±0.00		PEp 34:0-%T-lip	0.51	0.699	0.735	0.48	0.742	0.423	0.58	0.632	0.154
PEp 34:1-%T-lip	0.01 ±0.00	0.02 ±0.00	0.01 ±0.00	0.01 ±0.00	0.01 ±0.00	0.01 ±0.00		PEp 34:1-%T-lip	0.619	0.102	0.202	0.005**	0.388	0.027*	0.18	0.634	0.215
PEp 34:2-%T-lip	0.02 ±0.00	0.02 ±0.01	0.02 ±0.01	0.01 ±0.01	0.01 ±0.00	0.02 ±0.01		PEp 34:2-%T-lip	0.379	0.122	0.213	0.119	0.695	0.036*	0.557	0.477	0.645
PEp 36:0-%T-lip	0.00 ±0.00	0.00 ±0.00	0.00 ±0.00	0.00 ±0.00	0.00 ±0.00	0.00 ±0.00		PEp 36:0-%T-lip	0.192	0.193	0.801	0.096	0.068	0.36	0.423	0.46	0.578
PEp 36:1-%T-lip	0.02 ±0.00	0.02 ±0.00	0.01 ±0.00	0.01 ±0.00	0.01 ±0.00	0.02 ±0.00		PEp 36:1-%T-lip	0.159	0.348	0.519	0.003	0.695	0.051	0.815	0.137	0.52
PEp 36:2-%T-lip	0.03 ±0.01	0.04 ±0.01	0.03 ±0.01	0.02 ±0.01	0.03 ±0.01	0.03 ±0.01		PEp 36:2-%T-lip	0.211	0.141	0.302	0.191	0.578	0.23	0.17	0.679	0.188
PEp 36:3-%T-lip	0.02 ±0.00	0.02 ±0.01	0.02 ±0.00	0.02 ±0.01	0.01 ±0.00	0.02 ±0.01		PEp 36:3-%T-lip	0.134	0.154	0.115	0.458	0.795	0.127	0.619	0.398	0.114
PEp 36:4-%T-lip	0.07 ±0.02	0.07 ±0.03	0.06 ±0.03	0.04 ±0.01	0.04 ±0.01	0.07 ±0.04		PEp 36:4-%T-lip	0.961	0.125	0.063	0.102	0.721	0.017	0.911	0.814	0.582
PEp 38:0-%T-lip	0.01 ±0.00	0.01 ±0.00	0.01 ±0.00	0.01 ±0.00	0.01 ±0.00	0.01 ±0.00		PEp 38:0-%T-lip	0.798	0.432	0.569	0.37	0.527	0.563	0.244	0.234	0.222
PEp 38:1-%T-lip	0.01 ±0.00	0.01 ±0.00	0.01 ±0.00	0.01 ±0.00	0.01 ±0.00	0.01 ±0.00		PEp 38:1-%T-lip	0.169	0.535	0.835	0.478	0.467	0.159	0.737	0.459	0.688
PEp 38:2-%T-lip	0.01 ±0.00	0.01 ±0.00	0.01 ±0.00	0.01 ±0.00	0.01 ±0.00	0.01 ±0.00		PEp 38:2-%T-lip	0.777	0.928	0.105	0.583	0.436	0.313	0.383	0.89	0.203
PEp 38:3-%T-lip	0.02 ±0.00	0.02 ±0.01	0.02 ±0.01	0.01 ±0.00	0.02 ±0.01	0.02 ±0.01		PEp 38:3-%T-lip	0.748	0.227	0.129	0.129	0.885	0.516	0.813	0.482	0.995
PEp 38:4-%T-lip	0.14 ±0.02	0.12 ±0.02	0.10 ±0.04	0.09 ±0.02	0.09 ±0.02	0.11 ±0.04		PEp 38:4-%T-lip	0.205	0.195	0.208	0.042	0.272	0.0004***	0.344	0.993	0.689
PEp 38:5-%T-lip	0.08 ±0.02	0.07 ±0.02	0.06 ±0.02	0.05 ±0.01	0.05 ±0.01	0.07 ±0.02		PEp 38:5-%T-lip	0.806	0.098	0.171	0.123	0.815	0.019*	0.497	0.781	0.456
PEp 38:6-%T-lip	0.10 ±0.01	0.12 ±0.04	0.09 ±0.04	0.07 ±0.02	0.08 ±0.01	0.11 ±0.04		PEp 38:6-%T-lip	0.35	0.025	0.163	0.013*	0.853	0.002**	0.691	0.758	0.374
PEp 40:4-%T-lip	0.02 ±0.00	0.02 ±0.01	0.02 ±0.00	0.02 ±0.00	0.02 ±0.01	0.02 ±0.01		PEp 40:4-%T-lip	0.83	0.685	0.974	0.097	0.177	0.422	0.24	0.461	0.521
PEp 40:5-%T-lip	0.02 ±0.00	0.02 ±0.01	0.02 ±0.01	0.02 ±0.01	0.02 ±0.01	0.02 ±0.01		PEp 40:5-%T-lip	0.732	0.096	0.311	0.09	0.655	0.053	0.876	0.652	0.675
PEp 40:6-%T-lip	0.13 ±0.02	0.14 ±0.03	0.12 ±0.05	0.11 ±0.03	0.09 ±0.01	0.13 ±0.03		PEp 40:6-%T-lip	0.763	0.288	0.08	0.217	0.040*	0.004**	0.247	0.419	0.958
PEp 40:7-%T-lip	0.06 ±0.02	0.07 ±0.02	0.05 ±0.02	0.05 ±0.02	0.05 ±0.01	0.06 ±0.02		PEp 40:7-%T-lip	0.814	0.04	0.381	0.040*	0.601	0.053	0.079	0.855	0.057
PEp 42:5-%T-lip	0.02 ±0.00	0.02 ±0.00	0.02 ±0.01	0.02 ±0.01	0.02 ±0.01	0.02 ±0.01		PEp 42:5-%T-lip	0.975	0.189	0.151	0.206	0.994	0.254	0.383	0.703	0.372
PEp 42:6-%T-lip	0.02 ±0.01	0.02 ±0.01	0.01 ±0.01	0.01 ±0.01	0.02 ±0.01	0.02 ±0.01		PEp 42:6-%T-lip	0.77	0.649	0.789	0.225	0.435	0.495	0.839	0.343	0.504
PEp 42:7-%T-lip	0.03 ±0.01	0.02 ±0.01	0.02 ±0.01	0.02 ±0.01	0.02 ±0.00	0.02 ±0.01		PEp 42:7-%T-lip	0.609	0.589	0.326	0.114	0.695	0.012	0.395	0.827	0.994
phosphatidic acid lipids (PA)								phosphatidic acid lipids (PA)
PA 30:0-%T-lip	0.0020 ±0.0007	0.0017 ±0.0006	0.0022 ±0.0006	0.0029 ±0.0008	0.0049 ±0.0011	0.0032 ±0.0009		PA 30:0-%T-lip	0.537	0.86	0.035	0.008**	0.005**	0.0004***	0.001***	0.006**	0.153
PA 32:0-%T-lip	0.0004 ±0.0003	0.0004 ±0.0003	0.0003 ±0.0004	0.0003 ±0.0004	0.0003 ±0.0004	0.0003 ±0.0002		PA 32:0-%T-lip	0.936	0.442	0.936	0.81	0.234	0.547	0.086	0.74	0.751
PA 32:1-%T-lip	0.0003 ±0.0001	0.0004 ±0.0001	0.0004 ±0.0001	0.0004 ±0.0001	0.0004 ±0.0001	0.0003 ±0.0001		PA 32:1-%T-lip	0.565	0.2	0.223	0.078	0.351	0.421	0.172	0.995	0.764
PA 34:0-%T-lip	0.0004 ±0.0002	0.0005 ±0.0002	0.0005 ±0.0005	0.0004 ±0.0006	0.0005 ±0.0001	0.0003 ±0.0001		PA 34:0-%T-lip	0.559	0.919	0.007**	0.976	0.474	0.553	0.1	0.773	0.459
PA 34:1-%T-lip	0.0013 ±0.0002	0.0017 ±0.0008	0.0016 ±0.0008	0.0013 ±0.0008	0.0010 ±0.0002	0.0008 ±0.0002		PA 34:1-%T-lip	0.351	0.251	0.053	0.875	0.018*	0.109	0.049*	0.555	0.634
PA 34:2-%T-lip	0.0006 ±0.0002	0.0007 ±0.0002	0.0006 ±0.0002	0.0005 ±0.0003	0.0006 ±0.0001	0.0005 ±0.0001		PA 34:2-%T-lip	0.457	0.783	0.484	0.398	0.064	0.927	0.009**	0.692	0.628
PA 36:0-%T-lip	0.0005 ±0.0001	0.0005 ±0.0002	0.0006 ±0.0004	0.0006 ±0.0003	0.0005 ±0.0001	0.0003 ±0.0001		PA 36:0-%T-lip	0.81	0.235	0.010**	0.454	0.265	0.546	0.023*	0.823	0.491
PA 36:1-%T-lip	0.0019 ±0.0007	0.0021 ±0.0006	0.0020 ±0.0005	0.0018 ±0.0005	0.0020 ±0.0007	0.0016 ±0.0004		PA 36:1-%T-lip	0.579	0.911	0.129	0.444	0.064	0.889	0.052	0.642	0.501
PA 36:2-%T-lip	0.0007 ±0.0003	0.0009 ±0.0004	0.0008 ±0.0003	0.0007 ±0.0002	0.0007 ±0.0001	0.0006 ±0.0002		PA 36:2-%T-lip	0.501	0.448	0.153	0.656	0.304	0.676	0.057	0.975	0.156
PA 36:3-%T-lip	0.0003 ±0.0001	0.0004 ±0.0001	0.0003 ±0.0001	0.0003 ±0.0001	0.0003 ±0.0002	0.0003 ±0.0001		PA 36:3-%T-lip	0.222	0.406	0.504	0.675	0.163	0.748	0.134	0.887	0.893
PA 36:4-%T-lip	0.0004 ±0.0001	0.0004 ±0.0003	0.0004 ±0.0004	0.0005 ±0.0003	0.0004 ±0.0002	0.0002 ±0.0002		PA 36:4-%T-lip	0.716	0.58	0.36	0.737	0.899	0.464	0.030*	0.565	0.042
PA 38:0-%T-lip	0.0003 ±0.0001	0.0004 ±0.0001	0.0004 ±0.0002	0.0004 ±0.0002	0.0003 ±0.0001	0.0003 ±0.0001		PA 38:0-%T-lip	0.333	0.725	0.477	0.508	0.121	0.949	0.004**	0.775	0.329
PA 38:1-%T-lip	0.0004 ±0.0001	0.0005 ±0.0002	0.0004 ±0.0002	0.0004 ±0.0001	0.0004 ±0.0000	0.0003 ±0.0001		PA 38:1-%T-lip	0.091	0.845	0.157	0.644	0.244	0.576	0.016*	0.901	0.17
PA 38:2-%T-lip	0.0003 ±0.0001	0.0003 ±0.0002	0.0003 ±0.0001	0.0003 ±0.0001	0.0002 ±0.0001	0.0002 ±0.0001		PA 38:2-%T-lip	0.785	0.181	0.485	0.807	0.461	0.638	0.416	0.577	0.995
PA 38:3-%T-lip	0.0004 ±0.0001	0.0004 ±0.0001	0.0004 ±0.0003	0.0004 ±0.0003	0.0004 ±0.0002	0.0003 ±0.0001		PA 38:3-%T-lip	0.598	0.378	0.618	0.653	0.066	0.857	0.014*	0.432	0.037*
PA 38:4-%T-lip	0.0014 ±0.0004	0.0011 ±0.0006	0.0012 ±0.0006	0.0013 ±0.0006	0.0012 ±0.0002	0.0008 ±0.0003		PA 38:4-%T-lip	0.076	0.056	0.009**	0.469	0.241	0.335	0.275	0.923	0.844
PA 38:5-%T-lip	0.0003 ±0.0002	0.0004 ±0.0001	0.0005 ±0.0003	0.0005 ±0.0003	0.0005 ±0.0001	0.0003 ±0.0001		PA 38:5-%T-lip	0.362	0.63	0.040*	0.277	0.397	0.408	0.077	0.987	0.076
PA 38:6-%T-lip	0.0002 ±0.0002	0.0004 ±0.0001	0.0004 ±0.0002	0.0003 ±0.0002	0.0004 ±0.0001	0.0003 ±0.0001		PA 38:6-%T-lip	0.035	0.765	0.178	0.135	0.208	0.257	0.026*	0.902	0.81
PA 40:4-%T-lip	0.0004 ±0.0001	0.0003 ±0.0002	0.0004 ±0.0004	0.0005 ±0.0003	0.0004 ±0.0001	0.0003 ±0.0001		PA 40:4-%T-lip	0.2	0.274	0.002**	0.384	0.386	0.455	0.936	0.832	0.419
PA 40:5-%T-lip	0.0004 ±0.0001	0.0004 ±0.0003	0.0004 ±0.0003	0.0004 ±0.0002	0.0004 ±0.0002	0.0003 ±0.0001		PA 40:5-%T-lip	0.596	0.074	0.252	0.929	0.611	0.881	0.451	0.838	0.978
PA 40:6-%T-lip	0.0009 ±0.0003	0.0007 ±0.0004	0.0005 ±0.0003	0.0004 ±0.0002	0.0010 ±0.0005	0.0008 ±0.0004		PA 40:6-%T-lip	0.645	0.39	0.562	0.044*	0.669	0.608	0.867	0.123	0.883
PA 40:7-%T-lip	0.0002 ±0.0001	0.0003 ±0.0001	0.0002 ±0.0001	0.0002 ±0.0001	0.0003 ±0.0001	0.0002 ±0.0001		PA 40:7-%T-lip	0.541	0.703	0.048*	0.809	0.61	0.047*	0.426	0.097	0.499
PA 42:5-%T-lip	0.0002 ±0.0001	0.0003 ±0.0001	0.0003 ±0.0002	0.0003 ±0.0002	0.0004 ±0.0000	0.0003 ±0.0001		PA 42:5-%T-lip	0.695	0.677	0.247	0.423	0.287	0.015*	0.17	0.549	0.539
PA 42:6-%T-lip	0.0003 ±0.0001	0.0003 ±0.0001	0.0002 ±0.0002	0.0002 ±0.0001	0.0006 ±0.0002	0.0003 ±0.0003		PA 42:6-%T-lip	0.747	0.51	0.195	0.148	0.625	0.078	0.772	0.010*	0.64
PA 42:7-%T-lip	0.0002 ±0.0001	0.0002 ±0.0001	0.0003 ±0.0001	0.0003 ±0.0001	0.0003 ±0.0001	0.0002 ±0.0001		PA 42:7-%T-lip	0.397	0.515	0.117	0.152	0.953	0.021*	0.396	0.294	0.72
phosphatidylserine lipids (PS)								phosphatidylserine lipids (PS)
PS 30:0-%T-lip	0.0000 ±0.0000	0.0000 ±0.0000	0.0000 ±0.0000	0.0000 ±0.0000	0.0000 ±0.0000	0.0000 ±0.0000		PS 30:0-%T-lip	0	0	0	0	0	0	0	0	0
PS 32:0-%T-lip	0.0000 ±0.0000	0.0000 ±0.0000	0.0000 ±0.0000	0.0000 ±0.0000	0.0000 ±0.0000	0.0000 ±0.0000		PS 32:0-%T-lip	0	0	0	0	0	0	0	0	0
PS 32:1-%T-lip	0.0000 ±0.0000	0.0000 ±0.0000	0.0000 ±0.0000	0.0000 ±0.0000	0.0000 ±0.0000	0.0000 ±0.0000		PS 32:1-%T-lip	0	0	0	0	0	0	0	0	0
PS 34:0-%T-lip	0.0002 ±0.0001	0.0002 ±0.0001	0.0002 ±0.0001	0.0001 ±0.0000	0.0002 ±0.0001	0.0002 ±0.0001		PS 34:0-%T-lip	0.456	0.343	0.8	0.292	0.186	0.899	0.102	0.378	0.39
PS 34:1-%T-lip	0.0007 ±0.0003	0.0008 ±0.0003	0.0008 ±0.0003	0.0008 ±0.0002	0.0008 ±0.0002	0.0006 ±0.0002		PS 34:1-%T-lip	0.254	0.351	0.239	0.609	0.25	0.614	0.077	0.955	0.258
PS 34:2-%T-lip	0.0001 ±0.0001	0.0002 ±0.0000	0.0001 ±0.0000	0.0001 ±0.0000	0.0002 ±0.0000	0.0001 ±0.0001		PS 34:2-%T-lip	0.163	0.209	0.437	0.714	0.108	0.233	0.073	0.323	0.592
PS 36:0-%T-lip	0.0008 ±0.0003	0.0006 ±0.0002	0.0009 ±0.0005	0.0009 ±0.0005	0.0007 ±0.0002	0.0004 ±0.0001		PS 36:0-%T-lip	0.151	0.041*	0.065	0.435	0.299	0.133	0.047*	0.243	0.609
PS 36:1-%T-lip	0.0071 ±0.0037	0.0053 ±0.0022	0.0070 ±0.0035	0.0072 ±0.0031	0.0058 ±0.0028	0.0034 ±0.0011		PS 36:1-%T-lip	0.29	0.038*	0.161	0.911	0.053	0.118	0.07	0.154	0.839
PS 36:2-%T-lip	0.0016 ±0.0004	0.0011 ±0.0004	0.0014 ±0.0006	0.0017 ±0.0004	0.0015 ±0.0004	0.0007 ±0.0003		PS 36:2-%T-lip	0.038*	0.024*	0.039*	0.702	0.402	0.522	0.131	0.5	0.369
PS 36:3-%T-lip	0.0001 ±0.0001	0.0001 ±0.0000	0.0001 ±0.0000	0.0001 ±0.0000	0.0001 ±0.0000	0.0001 ±0.0000		PS 36:3-%T-lip	0.216	0.383	0.293	0.041*	0.418	0.201	0.533	0.53	0.421
PS 36:4-%T-lip	0.0002 ±0.0000	0.0001 ±0.0001	0.0002 ±0.0001	0.0002 ±0.0001	0.0001 ± 0.0000	0.0001 ±0.0001		PS 36:4-%T-lip	0.563	0.136	0.141	0.516	0.173	0.37	0.084	0.324	0.942
PS 38:0-%T-lip	0.0002 ±0.0001	0.0001 ±0.0000	0.0002 ±0.0000	0.0001 ±0.0001	0.0002 ±0.0000	0.0001 ±0.0001		PS 38:0-%T-lip	0.665	0.18	0.060*	0.356	0.062	0.778	0.186	0.208	0.465
PS 38:1-%T-lip	0.0007 ±0.0005	0.0005 ±0.0002	0.0007 ±0.0004	0.0007 ±0.0003	0.0006 ±0.0002	0.0003 ±0.0001		PS 38:1-%T-lip	0.345	0.032*	0.037*	0.991	0.093	0.537	0.032*	0.382	0.772
PS 38:2-%T-lip	0.0006 ±0.0003	0.0003 ±0.0001	0.0005 ±0.0003	0.0005 ±0.0002	0.0004 ±0.0001	0.0002 ±0.0001		PS 38:2-%T-lip	0.029*	0.039*	0.016*	0.587	0.314	0.11	0.22	0.208	0.58
PS 38:3-%T-lip	0.0017 ±0.0014	0.0007 ±0.0003	0.0015 ±0.0011	0.0016 ±0.0010	0.0013 ±0.0005	0.0005 ±0.0001		PS 38:3-%T-lip	0.163	0.087	0.020*	0.556	0.314	0.388	0.079	0.349	0.626
PS 38:4-%T-lip	0.0075 ±0.0062	0.0020 ±0.0008	0.0059 ±0.0054	0.0066 ±0.0047	0.0042 ±0.0023	0.0015 ±0.0004		PS 38:4-%T-lip	0.096	0.07	0.044*	0.418	0.239	0.138	0.079	0.092	0.38
PS 38:5-%T-lip	0.0005 ±0.0003	0.0002 ±0.0001	0.0004 ±0.0003	0.0005 ±0.0003	0.0003 ±0.0000	0.0001 ±0.0000		PS 38:5-%T-lip	0.058	0.077	0.003**	0.376	0.065	0.224	0.056	0.326	0.119
PS 38:6-%T-lip	0.0002 ±0.0000	0.0002 ±0.0001	0.0002 ±0.0001	0.0002 ±0.0001	0.0002 ±0.0001	0.0001 ±0.0001		PS 38:6-%T-lip	0.869	0.914	0.407	0.806	0.624	0.987	0.249	0.868	0.062
PS 40:4-%T-lip	0.0010 ±0.0005	0.0013 ±0.0009	0.0014 ±0.0008	0.0014 ±0.0004	0.0014 ±0.0014	0.0011 ±0.0004		PS 40:4-%T-lip	0.515	0.808	0.695	0.33	0.583	0.53	0.615	0.952	0.201
PS 40:5-%T-lip	0.0025 ± 0.0008	0.0030 ±0.0013	0.0027 ±0.0009	0.0027 ±0.0009	0.0026 ±0.0002	0.0017 ±0.0004		PS 40:5-%T-lip	0.247	0.619	0.018*	0.386	0.336	0.942	0.044*	0.716	0.029
PS 40:6-%T-lip	0.0123 ±0.0015	0.0141 ±0.0051	0.0127 ±0.0057	0.0115 ±0.0051	0.0150 ±0.0031	0.0107 ±0.0020		PS 40:6-%T-lip	0.376	0.461	0.014*	0.692	0.103	0.178	0.116	0.332	0.63
PS 40:7-%T-lip	0.0003 ±0.0001	0.0004 ±0.0002	0.0003 ±0.0001	0.0003 ±0.0001	0.0003 ±0.0001	0.0002 ±0.0001		PS 40:7-%T-lip	0.536	0.789	0.567	0.664	0.36	0.175	0.075	0.472	0.103
PS 42:5-%T-lip	0.0001 ±0.0001	0.0001 ±0.0000	0.0001 ±0.0001	0.0001 ±0.0001	0.0001±0.0000	0.0001 ±0.0000		PS 42:5-%T-lip	0.454	0.076	0.115	0.898	0.554	0.205	0.021*	0.348	0.388
PS 42:6-%T-lip	0.0001 ±0.0001	0.0001 ±0.0001	0.0001 ±0.0001	0.0001 ±0.0001	0.0001±0.0001	0.0001 ±0.0000		PS 42:6-%T-lip	0.888	0.227	0.185	0.676	0.177	0.629	0.408	0.957	0.336
PS 42:7-%T-lip	0.0001 ±0.0000	0.0001 ±0.0000	0.0001 ±0.0001	0.0001 ±0.0001	0.0001±0.0000	0.0001 ±0.0001		PS 42:7-%T-lip	0.911	0.017*	0.689	0.174	0.307	0.891	0.536	0.225	0.601
phosphatidylinositol lipids (PI)								phosphatidylinositol lipids (PI)
PI 30:0-%T-lip	0.0033 ±0.0017	0.0023 ±0.0006	0.0023 ±0.0009	0.0024 ±0.0008	0.0029 ±0.0019	0.0023 ±0.0005		PI 30:0-%T-lip	0.306	0.273	0.496	0.138	0.085	0.275	0.882	0.449	0.351
PI 32:0-%T-lip	0.0023 ±0.0014	0.0018 ±0.0009	0.0016 ±0.0010	0.0017 ±0.0011	0.0023 ±0.0019	0.0020 ±0.0012		PI 32:0-%T-lip	0.625	0.451	0.798	0.227	0.052	0.929	0.82	0.423	0.192
PI 32:1-%T-lip	0.0032 ±0.0020	0.0019 ±0.0011	0.0017 ±0.0011	0.0023 ±0.0012	0.0022 ±0.0015	0.0023 ±0.0009		PI 32:1-%T-lip	0.336	0.303	0.925	0.089	0.372	0.14	0.36	0.753	0.054
PI 34:0-%T-lip	0.0040 ±0.0018	0.0034 ±0.0015	0.0034 ±0.0019	0.0032 ±0.0015	0.0040 ±0.0024	0.0033 ±0.0009		PI 34:0-%T-lip	0.69	0.719	0.631	0.169	0.216	0.982	0.717	0.25	0.279
PI 34:1-%T-lip	0.0281 ±0.0120	0.0243 ±0.0097	0.0199 ±0.0079	0.0201 ±0.0058	0.0246 ±0.0120	0.0225 ±0.0082		PI 34:1-%T-lip	0.62	0.869	0.807	0.08	0.081	0.412	0.553	0.261	0.327
PI 34:2-%T-lip	0.0212 ±0.0068	0.0204 ±0.0086	0.0173 ±0.0060	0.0178 ±0.0032	0.0206 ±0.0090	0.0182 ±0.0066		PI 34:2-%T-lip	0.884	0.949	0.728	0.15	0.057	0.8	0.325	0.364	0.499
PI 36:0-%T-lip	0.0026 ±0.0010	0.0023 ±0.0007	0.0021 ±0.0009	0.0022 ±0.0008	0.0024 ±0.0011	0.0023 ±0.0006		PI 36:0-%T-lip	0.685	0.948	0.953	0.31	0.448	0.525	0.864	0.646	0.251
PI 36:1-%T-lip	0.0296 ±0.0100	0.0282 ±0.0080	0.0258 ±0.0083	0.0248 ±0.0081	0.0277 ±0.0091	0.0320 ±0.0086		PI 36:1-%T-lip	0.864	0.912	0.549	0.055	0.179	0.537	0.251	0.326	0.086
PI 36:2-%T-lip	0.0746 ±0.0289	0.0699 ±0.0327	0.0617 ±0.0239	0.0620 ±0.0221	0.0684 ±0.0297	0.0643 ±0.0212		PI 36:2-%T-lip	0.852	0.795	0.846	0.088	0.199	0.032*	0.497	0.416	0.182
PI 36:3-%T-lip	0.0151 ±0.0063	0.0111 ±0.0024	0.0112 ±0.0028	0.0122 ±0.0036	0.0137 ±0.0051	0.0116 ±0.0031		PI 36:3-%T-lip	0.234	0.461	0.488	0.259	0.298	0.245	0.766	0.302	0.247
PI 36:4-%T-lip	0.0201 ±0.0120	0.0136 ±0.0041	0.0127 ±0.0059	0.0152 ±0.0059	0.0185 ±0.0099	0.0138 ±0.0050		PI 36:4-%T-lip	0.294	0.406	0.423	0.18	0.009**	0.427	0.86	0.158	0.21
PI 38:0-%T-lip	0.0007 ±0.0003	0.0006 ±0.0003	0.0005 ±0.0001	0.0005 ±0.0001	0.0007 ±0.0001	0.0006 ±0.0003		PI 38:0-%T-lip	0.622	0.36	0.762	0.148	0.149	0.728	0.938	0.073	0.506
PI 38:1-%T-lip	0.0011 ±0.0005	0.0010 ±0.0004	0.0009 ±0.0003	0.0008 ±0.0003	0.0010 ±0.0004	0.0009 ±0.0002		PI 38:1-%T-lip	0.87	0.642	0.686	0.085	0.236	0.462	0.507	0.044	0.82
PI 38:2-%T-lip	0.0060 ±0.0018	0.0051 ±0.0024	0.0044 ±0.0012	0.0049 ±0.0015	0.0051 ±0.0015	0.0049 ±0.0011		PI 38:2-%T-lip	0.446	0.636	0.868	0.143	0.292	0.111	0.892	0.288	0.328
PI 38:3-%T-lip	0.0496 ±0.0183	0.0391 ±0.0143	0.0395 ±0.0106	0.0420 ±0.0069	0.0420 ±0.0117	0.0432 ±0.0154		PI 38:3-%T-lip	0.296	0.154	0.896	0.276	0.208	0.275	0.406	0.994	0.117
PI 38:4-%T-lip	0.1954 ±0.0679	0.1532 ±0.0474	0.1485 ±0.0357	0.1566 ±0.0234	0.1720 ±0.0551	0.1614 ±0.0534		PI 38:4-%T-lip	0.22	0.566	0.761	0.163	0.044*	0.217	0.496	0.353	0.139
PI 38:5-%T-lip	0.0126 ±0.0060	0.0080 ±0.0021	0.0084 ±0.0028	0.0098 ±0.0021	0.0107 ±0.0039	0.0081 ±0.0018		PI 38:5-%T-lip	0.202	0.067	0.306	0.225	0.019*	0.29	0.976	0.449	0.036*
PI 38:6-%T-lip	0.0024 ±0.0011	0.0022 ±0.0009	0.0021 ±0.0008	0.0021 ±0.0008	0.0023 ±0.0013	0.0022 ±0.0006		PI 38:6-%T-lip	0.832	0.936	0.886	0.195	0.53	0.771	0.782	0.521	0.635
PI 40:4-%T-lip	0.0040 ±0.0012	0.0027 ±0.0012	0.0026 ±0.0009	0.0029 ±0.0005	0.0030 ±0.0010	0.0027 ±0.0001		PI 40:4-%T-lip	0.027*	0.953	0.598	0.104	0.62	0.09	0.942	0.932	0.633
PI 40:5-%T-lip	0.0087 ±0.0035	0.0060 ±0.0023	0.0057 ±0.0020	0.0064 ±0.0019	0.0072 ±0.0028	0.0060 ±0.0021		PI 40:5-%T-lip	0.206	0.389	0.571	0.109	0.078	0.146	0.981	0.438	0.281
PI 40:6-%T-lip	0.0110 ±0.0036	0.0091 ±0.0031	0.0094 ±0.0032	0.0102 ±0.0042	0.0108 ±0.0048	0.0085 ±0.0016		PI 40:6-%T-lip	0.475	0.504	0.464	0.664	0.459	0.887	0.56	0.725	0.998
PI 40:7-%T-lip	0.0006 ±0.0002	0.0005 ±0.0001	0.0006 ±0.0001	0.0005 ±0.0002	0.0008 ±0.0004	0.0006 ±0.0003		PI 40:7-%T-lip	0.366	0.902	0.447	0.133	0.414	0.256	0.655	0.176	0.279
PI 42:5-%T-lip	0.0002 ±0.0001	0.0002 ±0.0000	0.0002 ±0.0001	0.0002 ±0.0001	0.0003 ±0.0002	0.0003 ±0.0001		PI 42:5-%T-lip	0.086	0.915	0.655	0.866	0.167	0.775	0.075	0.571	0.305
PI 42:6-%T-lip	0.0002 ±0.0000	0.0001 ±0.0001	0.0001 ±0.0001	0.0001 ±0.0001	0.0003 ±0.0001	0.0001 ±0.0001		PI 42:6-%T-lip	0.046	0.159	0.093	0.108	0.064	0.151	0.739	0.111	0.189
PI 42:7-%T-lip	0.0000 ±0.0000	0.0000 ±0.0000	0.0000 ±0.0000	0.0000 ±0.0000	0.0000 ±0.0000	0.0000 ±0.0000		PI 42:7-%T-lip	0	0	0	0	0	0	0	0	0
phosphatidyglycerollipids (PG)								phosphatidyglycerollipids (PG)
PG 30:0-%T-lip	0.000018 ±0.000007	0.000035 ±0.000011	0.000041 ±0.000015	0.000051 ±0.000007	0.000031 ±0.000015	0.000042 ±0.000016		PG 30:0-%T-lip	0.005**	0.0001***	0.287	0.001**	0.018*	0.15	0.306	0.103	0.035*
PG 32:0-%T-lip	0.000000 ±0.000000	0.000000 ±0.000000	0.000000 ±0.000000	0.000000 ±0.000000	0.000000 ±0.000000	0.000000 ±0.000000		PG 32:0-%T-lip	0	0	0	0	0	0	0	0	0
PG 32:1-%T-lip	0.000026 ±0.000009	0.000031 ±0.000011	0.000033 ±0.000017	0.000032 ±0.000016	0.000040 ±0.000014	0.000033 ±0.000009		PG 32:1-%T-lip	0.281	0.409	0.421	0.121	0.359	0.010*	0.755	0.114	0.037*
PG 34:0-%T-lip	0.000060 ±0.000011	0.000081 ±0.000030	0.000063 ±0.000027	0.000060 ±0.000018	0.000063 ±0.000014	0.000055 ±0.000023		PG 34:0-%T-lip	0.078	0.357	0.445	0.913	0.010*	0.602	0.018*	0.805	0.916
PG 34:1-%T-lip	0.000423 ±0.000060	0.000463 ±0.000156	0.000359 ±0.000159	0.000374 ±0.000133	0.000407 ±0.000059	0.000422 ±0.000151		PG 34:1-%T-lip	0.529	0.894	0.846	0.348	0.036*	0.555	0.158	0.589	0.249
PG 34:2-%T-lip	0.000069 ±0.000018	0.000072 ±0.000036	0.000063 ±0.000028	0.000064 ±0.000019	0.000180 ±0.000071	0.000233 ±0.000109		PG 34:2-%T-lip	0.821	0.646	0.524	0.4	0.697	0.017*	0.036*	0.013*	0.027*
PG 36:0-%T-lip	0.000152 ±0.000033	0.000201 ±0.000050	0.000182 ±0.000043	0.000183 ±0.000034	0.000132 ±0.000027	0.000202 ±0.000034		PG 36:0-%T-lip	0.215	0.045*	0.043*	0.073	0.122	0.348	0.953	0.097	0.051
PG 36:1-%T-lip	0.000290 ±0.000132	0.000279 ±0.000156	0.000248 ±0.000153	0.000285 ±0.000098	0.000241 ±0.000106	0.000325 ±0.000178		PG 36:1-%T-lip	0.786	0.655	0.439	0.906	0.4	0.253	0.406	0.173	0.85
PG 36:2-%T-lip	0.000660 ±0.000098	0.000846 ±0.000331	0.000751 ±0.000310	0.000778 ±0.000219	0.000820 ±0.000498	0.000696 ±0.000133		PG 36:2-%T-lip	0.344	0.963	0.606	0.33	0.583	0.548	0.24	0.867	0.544
PG 36:3-%T-lip	0.000022 ±0.000016	0.000030 ±0.000016	0.000025 ±0.000019	0.000030 ±0.000014	0.000044 ±0.000020	0.000048 ±0.000023		PG 36:3-%T-lip	0.351	0.509	0.845	0.036*	0.577	0.06	0.133	0.164	0.154
PG 36:4-%T-lip	0.000053 ±0.000020	0.000092 ±0.000034	0.000069 ±0.000018	0.000070 ±0.000012	0.000081 ±0.000022	0.000063 ±0.000013		PG 36:4-%T-lip	0.039	0.869	0.146	0.16	0.226	0.012*	0.062	0.443	0.222
PG 38:0-%T-lip	0.000265 ±0.000081	0.000307 ±0.000060	0.000258 ±0.000038	0.000255 ±0.000038	0.000737 ±0.000392	0.000657 ±0.000322		PG 38:0-%T-lip	0.194	0.731	0.801	0.813	0.156	0.049*	0.083	0.045*	0.054
PG 38:1-%T-lip	0.000019 ±0.000008	0.000017 ±0.000010	0.000017 ±0.000010	0.000012 ±0.000009	0.000178 ±0.000102	0.000212 ±0.000134		PG 38:1-%T-lip	0.733	0.91	0.702	0.049*	0.645	0.030*	0.026*	0.025*	0.036*
PG 38:2-%T-lip	0.000015 ±0.000006	0.000028 ±0.000010	0.000021 ±0.000006	0.000022 ±0.000005	0.000129 ±0.000083	0.000134 ±0.000091		PG 38:2-%T-lip	0.151	0.295	0.944	0.06	0.069	0.037*	0.073	0.044*	0.0499*
PG 38:3-%T-lip	0.000011 ±0.000008	0.000015 ±0.000005	0.000011 ±0.000008	0.000010 ±0.000008	0.000068 ±0.000039	0.000074 ±0.000034		PG 38:3-%T-lip	0.494	0.796	0.824	0.903	0.185	0.022*	0.016*	0.042*	0.016*
PG 38:4-%T-lip	0.000089 ±0.000018	0.000113 ±0.000041	0.000076 ±0.000059	0.000070 ±0.000046	0.000114 ±0.000038	0.000087 ±0.000026		PG 38:4-%T-lip	0.236	0.293	0.206	0.225	0.24	0.244	0.105	0.16	0.264
PG 38:5-%T-lip	0.000016 ±0.000010	0.000029 ±0.000016	0.000024 ±0.000012	0.000022 ±0.000013	0.000034 ±0.000009	0.000035 ±0.000008		PG 38:5-%T-lip	0.139	0.664	0.665	0.291	0.147	0.091	0.38	0.164	0.023*
PG 38:6-%T-lip	0.000014 ±0.000007	0.000019 ±0.000007	0.000019 ±0.000010	0.000019 ±0.000010	0.000020 ±0.000005	0.000017 ±0.000007		PG 38:6-%T-lip	0.466	0.395	0.363	0.301	0.251	0.225	0.676	0.818	0.594
PG 40:4-%T-lip	0.000000 ±0.000000	0.000000 ±0.000000	0.000000 ±0.000000	0.000000 ±0.000000	0.000000 ±0.000000	0.000000 ±0.000000		PG 40:4-%T-lip	0	0	0	0	0	0	0	0	0
PG 40:5-%T-lip	0.000006 ±0.000004	0.000012 ±0.000007	0.000016 ±0.000012	0.000013 ±0.000012	0.000019 ±0.000014	0.000022 ±0.000022		PG 40:5-%T-lip	0.144	0.611	0.827	0.332	0.679	0.05	0.258	0.558	0.302
PG 40:6-%T-lip	0.000034 ±0.000006	0.000030 ±0.000022	0.000033 ±0.000027	0.000026 ±0.000029	0.000129 ±0.000064	0.000188 ±0.000104		PG 40:6-%T-lip	0.742	0.961	0.429	0.549	0.738	0.033*	0.018*	0.013*	0.017*
PG 40:7-%T-lip	0.000000 ±0.000000	0.000000 ±0.000000	0.000000 ±0.000000	0.000000 ±0.000000	0.000000 ±0.000000	0.000000 ±0.000000		PG 40:7-%T-lip	0	0	0	0	0	0	0	0	0
PG 42:5-%T-lip	0.000000 ±0.000000	0.000000 ±0.000000	0.000000 ±0.000000	0.000000 ±0.000000	0.000000 ±0.000000	0.000000 ±0.000000		PG 42:5-%T-lip	0	0	0	0	0	0	0	0	0
PG 42:6-%T-lip	0.000000 ±0.000000	0.000000 ±0.000000	0.000000 ±0.000000	0.000000 ±0.000000	0.000000 ±0.000000	0.000000 ±0.000000		PG 42:6-%T-lip	0	0	0	0	0	0	0	0	0
PG 42:7-%T-lip	0.000000 ±0.000000	0.000000 ±0.000000	0.000000 ±0.000000	0.000000 ±0.000000	0.000000 ±0.000000	0.000000 ±0.000000		PG 42:7-%T-lip	0	0	0	0	0	0	0	0	0
lysophosphatidylethanolamine (LPE)								lysophosphatidylethanolamine lipids (LPE)
LPE 16:0-%T-lip	0.006 ±0.002	0.005 ±0.001	0.004 ±0.001	0.005 ±0.002	0.006 ±0.002	0.006 ±0.001		LPE 16:0-%T-lip	0.475	0.459	0.933	0.215	0.119	0.921	0.103	0.19	0.517
LPE 16:1-%T-lip	0.001 ±0.000	0.002 ±0.001	0.002 ±0.001	0.001 ±0.001	0.002 ±0.001	0.001 ±0.001		LPE 16:1-%T-lip	0.426	0.99	0.661	0.947	0.591	0.588	0.667	0.236	0.894
LPE 18:0-%T-lip	0.011 ±0.004	0.012 ±0.005	0.009 ±0.002	0.010 ±0.003	0.013 ±0.003	0.011 ±0.004		LPE 18:0-%T-lip	0.665	0.502	0.444	0.419	0.295	0.493	0.543	0.080*	0.92
LPE 18:1-%T-lip	0.004 ±0.002	0.004 ±0.002	0.003 ±0.001	0.003 ±0.001	0.004 ±0.001	0.004 ±0.001		LPE 18:1-%T-lip	0.977	0.2	0.285	0.126	0.756	0.435	0.512	0.246	0.616
LPE 20:0-%T-lip	0.001 ±0.001	0.001 ±0.000	0.001 ±0.000	0.001 ±0.001	0.001 ±0.001	0.001 ±0.000		LPE 20:0-%T-lip	0.378	0.154	0.451	0.448	0.126	0.919	0.729	0.211	0.266
LPE 20:1-%T-lip	0.001 ±0.000	0.001 ±0.000	0.001 ±0.000	0.001 ±0.000	0.001 ±0.001	0.001 ±0.000		LPE 20:1-%T-lip	0.867	0.011*	0.921	0.846	0.102	0.954	0.949	0.929	0.116
LPE 20:2-%T-lip	0.001 ±0.000	0.001 ±0.000	0.001 ±0.000	0.001 ±0.000	0.002 ±0.001	0.001 ±0.001		LPE 20:2-%T-lip	0.015*	0.59	0.134	0.644	0.132	0.105	0.383	0.373	0.601
LPE 20:3-%T-lip	0.0005 ±0.0004	0.0009 ±0.0002	0.001 ±0.000	0.001 ±0.000	0.001 ±0.001	0.001 ±0.001		LPE 20:3-%T-lip	0.251	0.503	0.629	0.045*	0.87	0.051	0.228	0.85	0.226
LPE 20:4-%T-lip	0.004 ±0.002	0.004 ±0.002	0.004 ±0.002	0.003 ±0.001	0.004 ±0.001	0.005 ±0.002		LPE 20:4-%T-lip	0.64	0.147	0.81	0.512	0.29	0.131	0.21	0.048	0.077
lysophosphatidylcholine lipids (LPC)								lysophosphatidylcholine lipids (LPC)
LPC 16:0-%T-lip	0.115 ±0.041	0.134 ±0.031	0.105 ±0.021	0.103 ±0.030	0.135 ±0.052	0.170 ±0.029		LPC 16:0-%T-lip	0.499	0.377	0.375	0.375	0.393	0.194	0.074	0.042	0.002**
LPC 16:1-%T-lip	0.002 ±0.001	0.001 ±0.001	0.001 ±0.000	0.001 ±0.001	0.002 ±0.001	0.002 ±0.001		LPC 16:1-%T-lip	0.662	0.677	0.679	0.606	0.415	0.214	0.063	0.021*	0.033*
LPC 18:0-%T-lip	0.073 ±0.024	0.083 ±0.023	0.065 ±0.013	0.065 ±0.010	0.083 ±0.024	0.101 ±0.019		LPC 18:0-%T-lip	0.559	0.365	0.398	0.388	0.278	0.272	0.12	0.047*	0.005**
LPC 18:1-%T-lip	0.025 ±0.009	0.026 ±0.005	0.022 ±0.002	0.023 ±0.003	0.030 ±0.006	0.031 ±0.005		LPC 18:1-%T-lip	0.808	0.536	0.751	0.612	0.351	0.145	0.088	0.033*	0.008**
LPC 20:0-%T-lip	0.001 ±0.000	0.001 ±0.000	0.001 ±0.000	0.001 ±0.000	0.001 ±0.000	0.001 ±0.000		LPC 20:0-%T-lip	0.955	0.733	0.713	0.299	0.306	0.478	0.424	0.085	0.028*
LPC 20:1-%T-lip	0.001 ±0.000	0.001 ±0.000	0.001 ±0.000	0.001 ±0.000	0.001 ±0.000	0.001 ±0.000		LPC 20:1-%T-lip	0.477	0.291	0.445	0.404	0.311	0.324	0.211	0.005**	0.004**
LPC 20:2-%T-lip	0.001 ±0.000	0.001 ±0.000	0.001 ±0.000	0.001 ±0.000	0.001 ±0.000	0.001 ±0.000		LPC 20:2-%T-lip	0.95	0.556	0.952	0.621	0.715	0.09	0.091	0.041*	0.011*
LPC 20:3-%T-lip	0.003 ±0.002	0.003 ±0.001	0.002 ±0.000	0.003 ±0.001	0.004 ±0.002	0.004 ±0.001		LPC 20:3-%T-lip	0.829	0.687	0.619	0.709	0.972	0.044*	0.145	0.071	0.014*
LPC 20:4-%T-lip	0.009 ±0.006	0.009 ±0.003	0.006 ±0.002	0.009 ±0.005	0.013 ±0.005	0.012 ±0.004		LPC 20:4-%T-lip	0.915	0.809	0.592	0.879	0.906	0.029*	0.163	0.077	0.030*
lysophosphatidylcholine lipids (LPC)								lysophosphatidylcholine lipids (LPC)
LPI 16:0-%T-lip	0.0004 ±0.0001	0.0003 ±0.0001	0.0004 ±0.0001	0.0004 ±0.0001	0.0008 ±0.0002	0.0006 ±0.0002		LPI 16:0-%T-lip	0.501	0.849	0.395	0.345	0.133	0.013*	0.046*	0.003**	0.035*
LPI 16:1-%T-lip	0.0000 ±0.0000	0.0000 ±0.0000	0.0001 ±0.0000	0.0001 ±0.0000	0.0001 ±0.0001	0.0000 ±0.0000		LPI 16:1-%T-lip	0.634	0.996	0.081	0.327	0.857	0.098	0.604	0.216	0.614
LPI 18:0-%T-lip	0.0021 ±0.0002	0.0017 ±0.0007	0.0019 ±0.0007	0.0027 ±0.0009	0.0045 ±0.0008	0.0036 ±0.0007		LPI 18:0-%T-lip	0.243	0.496	0.253	0.234	0.114	0.002**	0.012*	0.003**	0.006**
LPI 18:1-%T-lip	0.0004 ±0.0001	0.0003 ±0.0001	0.0004 ±0.0001	0.0005 ±0.0003	0.0009 ±0.0002	0.0009 ±0.0002		LPI 18:1-%T-lip	0.047*	0.644	0.846	0.329	0.037	0.003**	0.005**	0.014*	0.010**
LPI 20:0-%T-lip	0.0000 ±0.0000	0.0000 ±0.0000	0.0000 ±0.0000	0.0000 ±0.0000	0.0001 ±0.0000	0.0000 ±0.0000		LPI 20:0-%T-lip	0.408	0.463	0.373	0.954	0.107	0.399	0.225	0.205	0.974
LPI 20:1-%T-lip	0.0000 ±0.0000	0.0000 ±0.0000	0.0000 ±0.0000	0.0000 ±0.0000	0.0000 ±0.0000	0.0000 ±0.0000		LPI 20:1-%T-lip	0	0	0	0	0	0	0	0	0
LPI 20:2-%T-lip	0.0000 ±0.0000	0.0000 ±0.0000	0.0000 ±0.0000	0.0000 ±0.0000	0.0000 ±0.0000	0.0000 ±0.0000		LPI 20:2-%T-lip	0	0	0	0	0	0	0	0	0
LPI 20:3-%T-lip	0.0000 ±0.0000	0.0000 ±0.0000	0.0000 ±0.0000	0.0000 ±0.0000	0.0000 ±0.0000	0.0000 ±0.0000		LPI 20:3-%T-lip	0	0	0	0	0	0	0	0	0
LPI 20:4-%T-lip	0.0000 ±0.0000	0.0000 ±0.0000	0.0000 ±0.0000	0.0000 ±0.0000	0.0000 ±0.0000	0.0000 ±0.0000		LPI 20:4-%T-lip	0	0	0	0	0	0	0	0	0
lysophosphatidylserine (LPS)	L1CAM-AD	L1CAM-Control	GLAST-AD	GLAST- Control	Tetraspanin-AD	Tetraspanin- Control		lysophosphatidylserine (LPS)
LPS 16:0-%T-lip	0.0003 ±0.0001	0.0003±0.0001	0.0003±0.0001	0.0002±0.0001	0.0002±0.0001	0.0002±0.0001		LPS 16:0-%T-lip	0.435	0.638	0.48	0.351	0.025*	0.736	0.041*	0.968	0.663
LPS 16:1-%T-lip	0.0001±0.0000	0.0001±0.0000	0.0001±0.0001	0.0001±0.0000	0.0001±0.0001	0.0001±0.0000		LPS 16:1-%T-lip	0.792	0.962	0.543	0.174	0.255	0.457	0.678	0.26	0.587
LPS 18:0-%T-lip	0.0061±0.0014	0.0084±0.0034	0.0052±0.0023	0.0039±0.0012	0.0049±0.0017	0.0030±0.0025		LPS 18:0-%T-lip	0.219	0.143	0.349	0.034*	0.071	0.167	0.018*	0.188	0.095
LPS 18:1-%T-lip	0.0010±0.0007	0.0011±0.0003	0.0010±0.0002	0.0009±0.0003	0.0009±0.0007	0.0009±0.0004		LPS 18:1-%T-lip	0.629	0.785	0.951	0.932	0.274	0.938	0.41	0.985	0.865
LPS 20:0-%T-lip	0.0001±0.0001	0.0001±0.0000	0.0001±0.0000	0.0000±0.0000	0.0001±0.0001	0.0001±0.0000		LPS 20:0-%T-lip	0.806	0.158	0.434	0.122	0.985	0.955	0.507	0.027	0.718
LPS 20:1-%T-lip	0.0001±0.0001	0.0001±0.0000	0.0001±0.0001	0.0001±0.0000	0.0002±0.0001	0.0001±0.0000		LPS 20:1-%T-lip	0.499	0.32	0.084	0.155	0.808	0.677	0.367	0.069	0.491
LPS 20:4-%T-lip	0.0001±0.0001	0.0002±0.0001	0.0002±0.0001	0.0002±0.0001	0.0002±0.0001	0.0002±0.0001		LPS 20:4-%T-lip	0.234	0.037*	0.39	0.132	0.15	0.141	0.329	0.72	0.136
LPS 22:0-%T-lip	0.0001±0.0001	0.0001±0.0000	0.0001±0.0001	0.0001±0.0001	0.0001±0.0001	0.0001±0.0000		LPS 22:0-%T-lip	0.721	0.519	0.864	0.157	0.315	0.975	0.87	0.44	0.474
LPS 22:1-%T-lip	0.0000±0.0000	0.0000±0.0000	0.0001±0.0000	0.0001±0.0000	0.0001±0.0001	0.0000±0.0000		LPS 22:1-%T-lip	0.981	0.657	0.315	0.52	0.755	0.243	0.953	0.383	0.675
LPS 24:0-%T-lip	0.0001±0.0001	0.0001±0.0001	0.0001±0.0000	0.0001±0.0000	0.0001±0.0000	0.0001±0.0001		LPS 24:0-%T-lip	0.624	0.402	0.636	0.386	0.622	0.986	0.597	0.264	0.64
LPS 24:1-%T-lip	0.0000 ±0.0001	0.0001±0.0000	0.0000±0.0000	0.0000±0.0000	0.0001±0.0000	0.0000±0.0000		LPS 24:1-%T-lip	0.849	0.106	0.108	0.674	0.352	0.208	0.445	0.099	0.246

## Sheet: Sup. Table 4  
Table S4. Enrichments for all individual lipids in NEVs from AD subjects
L1CAM			GLAST			Tetraspanin
Species	FA Chain	Patient Group Enrichment	Species	FA Chain	Patient Group Enrichment	Species	FA Chain	Patient Group Enrichment
PG	30:0	Control	DG	40:5/18:0	Control	AcylPG	16:0-36:0	Control
AcylPG	16:0-38:5	AD	PE	36:0	Control	BMP	32:1	Control
dhSM	d18:0/20:1	AD	PEp	38:6	Control	PG	36:0	Control
GM3	d18:0/18:0	AD	PEp	40:7	Control	Cer	d18:1/18:0	AD
GM3	d18:0/20:0	AD	BMP	38:1	AD	LacCer	d18:0/20:0	AD
GM3	d18:1/18:0	AD	BMP	38:4	AD	LPS	20:1	AD
GM3	d18:1/18:1	AD	dhCer	d18:0/20:0	AD	PA	30:0	AD
GM3	d18:1/20:0	AD	LPE	20:1	AD	PA	34:0	AD
GM3	d18:1/20:1	AD	PG	30:0	AD	PA	38:4	AD
MhCer	d18:0/26:1	AD	PI	38:5	AD	PA	40:4	AD
NAPE	p18:0/22:4/20:4	AD	PS	36:1	AD	PA	40:7	AD
Sulf	d18:1/20:1	AD	PS	36:2	AD	PCe	36:0	AD
			PS	38:1	AD	PCe	36:1	AD
			PS	38:4	AD	PI	42:6	AD
						PS	36:0	AD
						PS	36:2	AD
						PS	38:1	AD
						PS	38:2	AD
						PS	38:3	AD
						PS	38:4	AD
						PS	38:5	AD
						PS	40:5	AD
						PS	40:6	AD

## Sheet: Sup. Table 5  
Table S5. Enrichments for all individual lipids between EV subsets
Healthy Controls										AD Patients
L1CAM vs GLAST			L1CAM vs Tetraspanin			GLAST vs Tetraspanin				L1CAM vs GLAST			L1CAM vs Tetraspanin			GLAST vs Tetraspanin
Species	FA Chain	EV Subtype Enrichment	Species	FA Chain	EV Subtype Enrichment	Species	FA Chain	EV Subtype Enrichment		Species	FA Chain	EV Subtype Enrichment	Species	FA Chain	EV Subtype Enrichment	Species	FA Chain	EV Subtype Enrichment
CE	20:2	GLAST	CE	20:1	Tetraspanin	FC		Tetraspanin		dhCer	d18:0/20:0	GLAST	dhCer	d18:0/22:0	Tetraspanin	AC	C14:0	Tetraspanin
Cer	d18:1/16:1	GLAST	CE	22:4	Tetraspanin	Cer	d18:1/16:0	Tetraspanin		dhCer	d18:0/24:0	GLAST	Cer	d18:1/16:1	Tetraspanin	MG	20:0	Tetraspanin
Sulf	d18:1/26:1	GLAST	Sulf	d18:0/16:0	Tetraspanin	Cer	d18:1/20:1	Tetraspanin		LacCer	d18:0/18:0	GLAST	Cer	d18:1/20:1	Tetraspanin	Sulf	d18:0/22:0	Tetraspanin
PA	30:0	GLAST	Sulf	d18:0/18:0	Tetraspanin	SM	d18:1/20:0	Tetraspanin		GM3	d18:1/22:0	GLAST	SM	d18:1/16:1	Tetraspanin	Sulf	d18:1/16:1	Tetraspanin
TG	52:3/18:1	L1CAM	Sulf	d18:0/24:0	Tetraspanin	SM	d18:1/26:0	Tetraspanin		PA	30:0	GLAST	dhSM	d18:0/16:0	Tetraspanin	GM3	d18:0/20:0	Tetraspanin
TG	52:5/18:1	L1CAM	Sulf	d18:1/16:0	Tetraspanin	SM	d18:1/26:1	Tetraspanin		PG	30:0	GLAST	Sulf	d18:0/20:0	Tetraspanin	GM3	d18:0/22:0	Tetraspanin
TG	54:4/18:1	L1CAM	Sulf	d18:1/20:1	Tetraspanin	dhSM	d18:0/18:0	Tetraspanin		PG	36:3	GLAST	Sulf	d18:0/22:0	Tetraspanin	GM3	d18:1/20:0	Tetraspanin
TG	54:6/18:1	L1CAM	Sulf	d18:1/22:0	Tetraspanin	dhSM	d18:0/18:1	Tetraspanin		NSer	16:0	GLAST	Sulf	d18:1/16:1	Tetraspanin	GB3	d18:1/20:1	Tetraspanin
TG	54:6/20:4	L1CAM	Sulf	d18:1/22:1	Tetraspanin	dhSM	d18:0/20:0	Tetraspanin		AC	C12:0	L1CAM	Sulf	d18:1/18:0	Tetraspanin	GB3	d18:1/24:0	Tetraspanin
TG	54:7/20:4	L1CAM	Sulf	d18:1/24:0	Tetraspanin	dhSM	d18:0/22:0	Tetraspanin		AC	C8:0	L1CAM	Sulf	d18:1/20:0	Tetraspanin	PA	30:0	Tetraspanin
TG	56:4/18:1	L1CAM	Sulf	d18:1/24:1	Tetraspanin	dhSM	d18:0/22:1	Tetraspanin		MG	20:0	L1CAM	Sulf	d18:1/24:0	Tetraspanin	PCe	32:0	Tetraspanin
TG	56:7/20:4	L1CAM	GM3	d18:0/18:0	Tetraspanin	dhSM	d18:0/24:0	Tetraspanin		MG	22:2	L1CAM	Sulf	d18:1/24:1	Tetraspanin	PCe	36:0	Tetraspanin
TG	56:9/20:4	L1CAM	GM3	d18:0/20:0	Tetraspanin	dhSM	d18:0/24:1	Tetraspanin		TG	50:1/16:1	L1CAM	GM3	d18:0/20:0	Tetraspanin	PI	38:1	Tetraspanin
TG	58:9/22:6	L1CAM	GM3	d18:0/22:0	Tetraspanin	MhCer	d18:0/16:0	Tetraspanin		TG	58:5/20:4	L1CAM	GM3	d18:1/20:0	Tetraspanin	PG	34:2	Tetraspanin
TG	60:7/22:6	L1CAM	GM3	d18:1/18:0	Tetraspanin	MhCer	d18:0/22:0	Tetraspanin		dhCer	d18:0/22:1	L1CAM	PA	30:0	Tetraspanin	LPC	16:0	Tetraspanin
MhCer	d18:0/24:0	L1CAM	GM3	d18:1/18:1	Tetraspanin	MhCer	d18:0/22:1	Tetraspanin		dhSM	d18:0/18:1	L1CAM	PA	42:5	Tetraspanin	LPC	16:1	Tetraspanin
MhCer	d18:0/24:1	L1CAM	GM3	d18:1/20:0	Tetraspanin	MhCer	d18:0/24:0	Tetraspanin		dhSM	d18:0/20:1	L1CAM	PA	42:7	Tetraspanin	LPC	18:0	Tetraspanin
MhCer	d18:1/20:0	L1CAM	GM3	d18:1/22:0	Tetraspanin	MhCer	d18:0/24:1	Tetraspanin		PC	32:1	L1CAM	PG	32:1	Tetraspanin	LPC	18:1	Tetraspanin
MhCer	d18:1/22:0	L1CAM	GM3	d18:1/22:1	Tetraspanin	MhCer	d18:1/16:0	Tetraspanin		PC	38:0	L1CAM	PG	34:2	Tetraspanin	LPC	20:1	Tetraspanin
MhCer	d18:1/24:1	L1CAM	GB3	d18:1/22:1	Tetraspanin	MhCer	d18:1/16:1	Tetraspanin		PC	38:1	L1CAM	PG	36:4	Tetraspanin	LPC	20:2	Tetraspanin
GB3	d18:1/22:1	L1CAM	PA	30:0	Tetraspanin	MhCer	d18:1/20:0	Tetraspanin		PC	40:7	L1CAM	PG	38:0	Tetraspanin	LPC	20:3	Tetraspanin
PA	38:3	L1CAM	PG	34:2	Tetraspanin	MhCer	d18:1/22:0	Tetraspanin		PC	42:6	L1CAM	PG	40:6	Tetraspanin	LPCe	16:0	Tetraspanin
PC	30:0	L1CAM	PG	38:0	Tetraspanin	MhCer	d18:1/24:0	Tetraspanin		PC	42:7	L1CAM	LPC	20:2	Tetraspanin	LPCe	18:0	Tetraspanin
PC	32:0	L1CAM	PG	38:3	Tetraspanin	Sulf	d18:0/16:0	Tetraspanin		PCe	32:0	L1CAM	LPC	20:3	Tetraspanin	LPCe	18:1	Tetraspanin
PC	32:1	L1CAM	BMP	32:1	Tetraspanin	Sulf	d18:0/24:0	Tetraspanin		PCe	40:7	L1CAM	LPC	20:4	Tetraspanin	LPCe	20:0	Tetraspanin
PC	38:1	L1CAM	LPCe	18:1	Tetraspanin	Sulf	d18:1/16:0	Tetraspanin		PCe	42:7	L1CAM	LPE	20:2	Tetraspanin	LPCe	20:1	Tetraspanin
PC	40:7	L1CAM	LPCe	20:1	Tetraspanin	Sulf	d18:1/16:1	Tetraspanin		PE	36:1	L1CAM	LPI	16:0	Tetraspanin	LPCe	20:2	Tetraspanin
PC	42:7	L1CAM	LPI	16:0	Tetraspanin	Sulf	d18:1/18:1	Tetraspanin		PEp	34:1	L1CAM	LPI	18:0	Tetraspanin	LPI	16:0	Tetraspanin
PCe	30:0	L1CAM	LPI	18:0	Tetraspanin	Sulf	d18:1/22:0	Tetraspanin		PEp	36:1	L1CAM	LPI	18:1	Tetraspanin	LPI	18:0	Tetraspanin
PCe	32:0	L1CAM	LPI	18:1	Tetraspanin	Sulf	d18:1/22:1	Tetraspanin		PEp	38:6	L1CAM	DG	32:1/16:0	L1CAM	LPI	18:1	Tetraspanin
PCe	32:1	L1CAM	CE	16:0	L1CAM	Sulf	d18:1/24:1	Tetraspanin		PEp	40:7	L1CAM	DG	34:1/16:0	L1CAM	CE	22:4	GLAST
PCe	40:5	L1CAM	MG	18:2	L1CAM	GM3	d18:0/16:0	Tetraspanin		PI	32:1	L1CAM	DG	34:2/16:0	L1CAM	DG	34:1/16:0	GLAST
PCe	42:6	L1CAM	MG	20:1	L1CAM	GM3	d18:0/20:0	Tetraspanin		PI	34:1	L1CAM	DG	34:2/16:1	L1CAM	DG	34:2/16:0	GLAST
PE	36:4	L1CAM	MG	22:1	L1CAM	GM3	d18:1/16:0	Tetraspanin		LPCe	16:1	L1CAM	DG	36:1/18:0	L1CAM	DG	34:2/16:1	GLAST
PE	38:2	L1CAM	DG	32:2/16:1	L1CAM	GM3	d18:1/18:0	Tetraspanin		LPEp	18:0	L1CAM	DG	36:2/18:0	L1CAM	DG	36:1/18:0	GLAST
PI	32:0	L1CAM	DG	34:0/16:0	L1CAM	GM3	d18:1/20:0	Tetraspanin		LPS	18:0	L1CAM	DG	36:2/18:1	L1CAM	DG	36:2/18:0	GLAST
PI	36:4	L1CAM	DG	36:2/18:1	L1CAM	GM3	d18:1/20:1	Tetraspanin					DG	36:3/18:1	L1CAM	DG	36:2/18:1	GLAST
PI	38:5	L1CAM	TG	48:1/16:0	L1CAM	GM3	d18:1/22:0	Tetraspanin					DG	38:2/18:1	L1CAM	DG	36:3/18:1	GLAST
PG	30:0	L1CAM	TG	50:2/16:1	L1CAM	GB3	d18:1/22:0	Tetraspanin					DG	38:4/18:1	L1CAM	DG	38:2/18:1	GLAST
PG	34:0	L1CAM	TG	50:3/16:1	L1CAM	GB3	d18:1/22:1	Tetraspanin					DG	40:5/18:1	L1CAM	DG	38:4/18:1	GLAST
BMP	38:5	L1CAM	TG	52:3/18:1	L1CAM	GB3	d18:1/24:0	Tetraspanin					DG	40:6/18:1	L1CAM	DG	40:5/18:1	GLAST
LPEp	18:0	L1CAM	TG	52:4/18:1	L1CAM	PC	32:0	Tetraspanin					TG	48:0/16:0	L1CAM	DG	40:6/18:1	GLAST
			TG	52:5/18:1	L1CAM	PCe	32:0	Tetraspanin					TG	50:1/16:1	L1CAM	TG	48:0/16:0	GLAST
			TG	52:5/20:4	L1CAM	PCe	32:1	Tetraspanin					TG	50:3/16:1	L1CAM	TG	48:1/16:0	GLAST
			TG	54:3/18:0	L1CAM	PE	40:5	Tetraspanin					TG	52:2/18:0	L1CAM	TG	50:1/16:1	GLAST
			TG	54:4/18:1	L1CAM	PE	42:6	Tetraspanin					TG	52:4/18:1	L1CAM	TG	50:2/16:1	GLAST
			TG	54:4/20:4	L1CAM	PI	32:1	Tetraspanin					TG	52:5/18:1	L1CAM	TG	50:3/16:1	GLAST
			TG	54:5/18:1	L1CAM	PI	38:5	Tetraspanin					TG	52:5/20:4	L1CAM	TG	52:2/18:0	GLAST
			TG	54:5/20:4	L1CAM	PG	34:2	Tetraspanin					TG	54:2/18:0	L1CAM	TG	52:3/18:1	GLAST
			TG	54:6/18:1	L1CAM	PG	38:0	Tetraspanin					TG	54:3/18:0	L1CAM	TG	52:4/18:1	GLAST
			TG	54:6/20:4	L1CAM	PG	38:2	Tetraspanin					TG	54:4/20:4	L1CAM	TG	52:5/18:1	GLAST
			TG	54:7/18:1	L1CAM	PG	38:3	Tetraspanin					TG	54:5/18:1	L1CAM	TG	52:5/20:4	GLAST
			TG	54:7/20:4	L1CAM	PG	38:5	Tetraspanin					TG	54:5/20:4	L1CAM	TG	54:2/18:0	GLAST
			TG	56:4/18:1	L1CAM	BMP	32:1	Tetraspanin					TG	54:6/18:1	L1CAM	TG	54:3/18:0	GLAST
			TG	56:5/18:1	L1CAM	BMP	34:1	Tetraspanin					TG	54:6/20:4	L1CAM	TG	54:4/18:1	GLAST
			TG	56:5/20:4	L1CAM	BMP	42:7	Tetraspanin					TG	54:7/18:1	L1CAM	TG	54:4/20:4	GLAST
			TG	56:6/20:4	L1CAM	LPC	16:0	Tetraspanin					TG	54:7/20:4	L1CAM	TG	54:5/18:1	GLAST						48:0/16:0	48:0/16:0
			TG	56:7/20:4	L1CAM	LPC	16:1	Tetraspanin					TG	56:3/18:1	L1CAM	TG	54:5/20:4	GLAST							48:1/16:0
			TG	56:8/20:4	L1CAM	LPC	18:0	Tetraspanin					TG	56:4/18:1	L1CAM	TG	54:6/18:1	GLAST						50:1/16:1	50:1/16:1
			TG	56:9/20:4	L1CAM	LPC	18:1	Tetraspanin					TG	56:4/20:4	L1CAM	TG	54:6/20:4	GLAST							50:2/16:1
			TG	58:6/20:4	L1CAM	LPC	20:0	Tetraspanin					TG	56:5/18:1	L1CAM	TG	54:7/18:1	GLAST						50:3/16:1	50:3/16:1
			TG	58:7/20:4	L1CAM	LPC	20:1	Tetraspanin					TG	56:7/20:4	L1CAM	TG	54:7/20:4	GLAST						52:2/18:0	52:2/18:0
			TG	58:8/22:6	L1CAM	LPC	20:2	Tetraspanin					TG	56:8/20:4	L1CAM	TG	56:3/18:1	GLAST							52:3/18:1
			TG	58:9/22:6	L1CAM	LPC	20:3	Tetraspanin					TG	56:9/20:4	L1CAM	TG	56:4/18:1	GLAST						52:4/18:1	52:4/18:1
			TG	60:7/22:6	L1CAM	LPC	20:4	Tetraspanin					TG	58:5/20:4	L1CAM	TG	56:4/20:4	GLAST						52:5/18:1	52:5/18:1
			TG	60:8/22:6	L1CAM	LPCe	16:0	Tetraspanin					TG	58:6/20:4	L1CAM	TG	56:5/18:1	GLAST						52:5/20:4	52:5/20:4
			TG	60:9/22:6	L1CAM	LPCe	16:1	Tetraspanin					TG	58:8/22:6	L1CAM	TG	56:5/20:4	GLAST						54:2/18:0	54:2/18:0
			MhCer	d18:1/22:1	L1CAM	LPCe	18:0	Tetraspanin					TG	58:9/22:6	L1CAM	TG	56:6/20:4	GLAST						54:3/18:0	54:3/18:0
			PA	34:1	L1CAM	LPCe	18:1	Tetraspanin					PC	32:1	L1CAM	TG	56:7/20:4	GLAST						54:4/20:4	54:4/18:1
			PA	34:2	L1CAM	LPCe	20:0	Tetraspanin					PC	38:0	L1CAM	TG	56:8/20:4	GLAST							54:4/20:4
			PA	36:0	L1CAM	LPCe	20:1	Tetraspanin					PC	38:1	L1CAM	TG	56:9/20:4	GLAST						54:5/18:1	54:5/18:1
			PA	36:1	L1CAM	LPI	16:0	Tetraspanin					PC	40:7	L1CAM	TG	58:6/20:4	GLAST						54:5/20:4	54:5/20:4
			PA	36:2	L1CAM	LPI	18:0	Tetraspanin					PC	42:6	L1CAM	TG	58:7/20:4	GLAST						54:6/18:1	54:6/18:1
			PA	38:0	L1CAM	LPI	18:1	Tetraspanin					PC	42:7	L1CAM	TG	58:8/22:6	GLAST						54:6/20:4	54:6/20:4
			PA	38:1	L1CAM	NAPE	p18:0/22:4/20:4	Tetraspanin					PCe	40:7	L1CAM	TG	58:9/22:6	GLAST						54:7/18:1	54:7/18:1
			PA	38:3	L1CAM	CE	20:3	GLAST					PE	34:2	L1CAM	TG	60:8/22:6	GLAST						54:7/20:4	54:7/20:4
			PA	38:5	L1CAM	CE	20:4	GLAST					PE	36:0	L1CAM	TG	60:9/22:6	GLAST						56:3/18:1	56:3/18:1
			PA	38:6	L1CAM	CE	22:6	GLAST					PE	36:1	L1CAM	dhCer	d18:0/18:1	GLAST						56:4/18:1	56:4/18:1
			PC	36:4	L1CAM	MG	18:2	GLAST					PE	36:3	L1CAM	PS	38:4	GLAST						56:4/20:4	56:4/20:4
			PC	38:1	L1CAM	MG	20:1	GLAST					PE	38:0	L1CAM	BMP	38:4	GLAST						56:5/18:1	56:5/18:1
			PCe	34:1	L1CAM	MG	20:2	GLAST					PE	38:1	L1CAM										56:5/20:4
			PCe	34:2	L1CAM	MG	22:1	GLAST					PE	38:3	L1CAM										56:6/20:4
			PCe	36:2	L1CAM	DG	32:2/16:1	GLAST					PE	38:4	L1CAM									56:7/20:4	56:7/20:4
			PCe	36:3	L1CAM	DG	36:3/18:1	GLAST					PEp	34:1	L1CAM									56:8/20:4	56:8/20:4
			PCe	38:5	L1CAM	DG	38:2/18:1	GLAST					PEp	34:2	L1CAM									56:9/20:4	56:9/20:4
			PCe	38:6	L1CAM	DG	38:4/18:1	GLAST					PEp	36:4	L1CAM									58:5/20:4
			PE	38:1	L1CAM	DG	40:5/18:1	GLAST					PEp	38:4	L1CAM									58:6/20:4	58:6/20:4
			PS	36:0	L1CAM	TG	48:1/16:0	GLAST					PEp	38:5	L1CAM										58:7/20:4
			PS	36:1	L1CAM	TG	50:2/16:1	GLAST					PEp	38:6	L1CAM									58:8/22:6	58:8/22:6
			PS	38:1	L1CAM	TG	50:3/16:1	GLAST					PEp	40:5	L1CAM									58:9/22:6	58:9/22:6
			PS	40:5	L1CAM	TG	52:3/18:1	GLAST					PEp	40:6	L1CAM										60:8/22:6
			PG	34:0	L1CAM	TG	52:4/18:1	GLAST					PEp	42:7	L1CAM										60:9/22:6
			PG	36:4	L1CAM	TG	52:5/18:1	GLAST					PS	36:1	L1CAM
			BMP	40:4	L1CAM	TG	52:5/20:4	GLAST					PS	38:4	L1CAM
			BMP	40:7	L1CAM	TG	54:3/18:0	GLAST					PI	36:2	L1CAM
			LPS	16:0	L1CAM	TG	54:4/18:1	GLAST					BMP	38:4	L1CAM
			LPS	18:0	L1CAM	TG	54:4/20:4	GLAST					AcylPG	16:0-34:1	L1CAM
						TG	54:5/18:1	GLAST					AcylPG	16:0-34:2	L1CAM
						TG	54:5/20:4	GLAST					AcylPG	16:0-36:0	L1CAM
						TG	54:6/20:4	GLAST					AcylPG	16:0-38:1	L1CAM
						TG	54:7/18:1	GLAST					LPEp	18:0	L1CAM
						TG	54:7/20:4	GLAST
						TG	56:4/18:1	GLAST
						TG	56:5/18:1	GLAST
						TG	56:5/20:4	GLAST
						TG	56:6/20:4	GLAST
						TG	56:7/20:4	GLAST
						TG	56:8/20:4	GLAST
						TG	56:9/20:4	GLAST
						TG	58:7/20:4	GLAST
						TG	58:8/22:6	GLAST
						TG	58:9/22:6	GLAST
						TG	60:8/22:6	GLAST
						TG	60:9/22:6	GLAST
						PS	40:5	GLAST
AD-['GLAST',	'Tetraspanin']
CE	22:4	TRUE
AC	C14:0	FALSE
MG	20:0	FALSE
DG	34:1/16:0	TRUE
DG	34:2/16:0	TRUE
DG	34:2/16:1	TRUE
DG	36:1/18:0	TRUE
DG	36:2/18:0	TRUE
DG	36:2/18:1	TRUE
DG	36:3/18:1	TRUE
DG	38:2/18:1	TRUE
DG	38:4/18:1	TRUE
DG	40:5/18:1	TRUE
DG	40:6/18:1	TRUE
TG	48:0/16:0	TRUE
TG	48:1/16:0	TRUE
TG	50:1/16:1	TRUE
TG	50:2/16:1	TRUE
TG	50:3/16:1	TRUE
TG	52:2/18:0	TRUE
TG	52:3/18:1	TRUE
TG	52:4/18:1	TRUE
TG	52:5/18:1	TRUE
TG	52:5/20:4	TRUE
TG	54:2/18:0	TRUE
TG	54:3/18:0	TRUE
TG	54:4/18:1	TRUE
TG	54:4/20:4	TRUE
TG	54:5/18:1	TRUE
TG	54:5/20:4	TRUE
TG	54:6/18:1	TRUE
TG	54:6/20:4	TRUE
TG	54:7/18:1	TRUE
TG	54:7/20:4	TRUE
TG	56:3/18:1	TRUE
TG	56:4/18:1	TRUE
TG	56:4/20:4	TRUE
TG	56:5/18:1	TRUE
TG	56:5/20:4	TRUE
TG	56:6/20:4	TRUE
TG	56:7/20:4	TRUE
TG	56:8/20:4	TRUE
TG	56:9/20:4	TRUE
TG	58:6/20:4	TRUE
TG	58:7/20:4	TRUE
TG	58:8/22:6	TRUE
TG	58:9/22:6	TRUE
TG	60:8/22:6	TRUE
TG	60:9/22:6	TRUE
dhCer	d18:0/18:1	TRUE
Sulf	d18:0/22:0	FALSE
Sulf	d18:1/16:1	FALSE
GM3	d18:0/20:0	FALSE
GM3	d18:0/22:0	FALSE
GM3	d18:1/20:0	FALSE
GB3	d18:1/20:1	FALSE
GB3	d18:1/24:0	FALSE
PA	30:0	FALSE
PCe	32:0	FALSE
PCe	36:0	FALSE
PS	38:4	TRUE
PI	38:1	FALSE
PG	34:2	FALSE
BMP	38:4	TRUE
LPC	16:0	FALSE
LPC	16:1	FALSE
LPC	18:0	FALSE
LPC	18:1	FALSE
LPC	20:1	FALSE
LPC	20:2	FALSE
LPC	20:3	FALSE
LPCe	16:0	FALSE
LPCe	18:0	FALSE
LPCe	18:1	FALSE
LPCe	20:0	FALSE
LPCe	20:1	FALSE
LPCe	20:2	FALSE
LPI	16:0	FALSE
LPI	18:0	FALSE
LPI	18:1	FALSE

## Sheet: Sup. Table 6 
Table S6: Concentration and size of three different EV populations.
	EVs/ml		Size (mean)[nm]		Size (mode)[nm]
	AD	HC	AD	HC	AD	HC
NEV	6.89E+10 ± 5.06E+10	1.38E+11 ± 6.46E+10	175.40 ± 21.65	158.96 ± 8.13	137.60 ± 8.41	123.50 ±10.19
AEV	7.70E+10 ± 3.69E+10	1.06E+11 ± 6.19E+10	166.94 ± 23.63	154.70 ± 13.47	135.58 ± 18.04	126.52 ±11.02
Multi-origin EV	8.79E+10 ± 5.63E+10	1.87E+11 ± 1.17E+11	180.34 ±22.88	164.08 ± 12.44	137.16 ± 17.13	131.68 ± 14.58
numbers in the table shows mean ± SD

## Sheet: Lipid Glossary
AC	Acyl Carnitine
AcylPG	Acyl Phosphatidylglycerol
AD	Alzheimer's disease
AEV	Astrocytes Extracellular Vesicles
BMP	Bis(monoacylglycero)phosphate
CE	Cholesterol Ester
Cer	Ceramide
dhCer	Dihydroceramide
dhSM	Dihydrosphingomyelin
DG	Diacylglycerol
EVs	Extracellular Vesicles
FC	Free Cholesterol
GB3	Globotriaosylceramide
GLs	Glycerolipids
GLPs	Glycerophospholipids
GM3	Monosialodihexosylganglioside
LacCer	Lactosylceramide
LDL	Low-density lipoprotein
LPC	Lysophosphatidylcholine
LPCe	Ether lysophosphatidylcholine
LPE	Lysophosphatidylethanolamine
LPEp	Plasmogen Lysophosphatidylethanolamine
LPI	Lysophosphatidylinositol
LPLs	Lysophospholipids
LPS	Lysophosphatidylserine
HC	Healthy controls
HDL	High-density lipoprotein
MHCer	Monohexosylceramide
MG	Monoacylglycerol
NAPE	N-Acyl Phosphatidylethanolamine
NAPS	N-Acyl Phosphatidylserine
NSer	N-Acyl Serine
NEV	Neuronal Extracellular Vesicles
PA	Phosphatidic acid
PC	Phosphatylcholine
PCe	Ether phosphatidylcholine
PE	Phosphatidylethanolamine
PEp	Plasmalogen phosphatidylethanolamine
PG	Phosphatidylglycerol
PI	Phosphatidylinositol
PS	Phosphatidylserine
SLs	Sphingolipids
SM	Sphingomyelin
Sulf	Sulfatide
TG	Triacylglycerol
